# Supplementary material for: TIGRA: A targeted iterative graph routing assembler for breakpoint assembly
Source: HighWire-hosted journal article supplement (doi:10.1101/gr.162883.113), 2013-12-04
Supplement: Supplemental_Legends.docx [file Supplemental_Legends.docx]

**Supplementary Materials**

Supplementary Notes. Exploring read extraction parameters and detailed usage of TIGRA

Supplementary Figure 1. Assembly bias against breakpoint homology demonstrated from assembling 562 deletion breakpoints in Kidd et al. Cell (2010) and 8 low coverage samples in the 1000 Genomes Phase 3 project

Supplementary Figure 2. Four sets of reads and TIGRA assemblies in breakpoint assembly introduced by an inter-chromosomal rearrangement

Supplementary Figure 3. Importance of using a small k-mer size in assembling a unique but sparsely covered region

Supplementary Figure 4. Resolving repeats from the “multiple in, multiple out” structure using read sequences

Supplementary Figure 5. Alignment between the reference and 4 types of breakpoint assemblies: deletion, insertion, inversion and inter-chromosomal translocation

Supplementary Table 1. A list of 245 deletion breakpoints in Conrad et al (2010) and in 45 low coverage CEU samples in the 1000 Genomes pilot project

Supplementary Table 2. Optimization of TIGRA read extraction parameters (w, θ) in assembling 245 deletion breakpoints

Supplementary Table 3. A list of 552 deletion breakpoints in Kidd et al (2010) and in 8 low coverage samples in the 1000 Genomes Phase 3 project.

Supplementary Table 4. A list of 442 mobile element insertions assembled by TIGRA with classifications compared to those in the dbRIP and in the 1000 Genomes release
