# Supplementary material for: TIGRA: A targeted iterative graph routing assembler for breakpoint assembly
Source: HighWire-hosted journal article supplement (doi:10.1101/gr.162883.113), 2013-12-04
Supplement: Supplemental_Notes.docx [file Supplemental_Notes.docx]

Supplementary Notes:

TIGRA: A Targeted Iterative Graph Routing Assembler for Breakpoint Assembly

Ken Chen, Lei Chen, Xian Fan, John Wallis, Li Ding, George Weinstock

Exploring read extraction parameters

We explored different TIGRA parameters in our experiments. In particular, we examined results obtained from different w and θ (Materials and Methods) in assembling the 245 Conrad et al. deletions (Supplementary Table 2). Regardless of whether available genotype information was used or not, results were generally not sensitive to w and those obtained under the default w =500 bp were among the best. However, those obtained from smaller θ (e.g., θ=10) were evidently better than those obtained under the default θ=50. This indicated that better results could be obtained by carefully adjusting θ, i.e., based on the confidence interval of genomic breakpoints, as we described in Materials and Methods. In this experiment, the known breakpoints were used as input and the confidence interval was essentially 0. That is why smaller θ produced better results than the default. In other settings where the exact breakpoints are unknown (e.g., call sets produced based on discordant read pairing), larger θ may produce better results.

The best results in the parameter space that we explored were 225/245 (91.8%) when genotypes were used, and 208/245 (84.9%) when genotypes were not used. These percentages are around 10% better than what we reported in the Results (obtained under default parameters). This suggests that it may be a good practice to try different parameters in order to obtain the best result.

Note only less than 20 (7%) deletions were discrepant between these two sets. Almost all of these 20 deletions involve repeats and are thereby more susceptible to coverage variation. No noticeable patterns were found in deletion size or micro-homology.

TIGRA usage

**Introduction**

TIGRA is a computer program that performs targeted local assembly of structural variant (SV) breakpoints from next generation sequencing short-read data. It takes as input a list of putative SV calls and a set of bam files that contain reads mapped to a reference genome such as NCBI build36. For each SV call, it assembles the set of reads that were mapped or partially mapped to the region of interest (ROI) in the corresponding bam files. Instead of outputing a single consensus sequence, tigra attempts to construct all the alternative alleles in the ROI as long as they received sufficient sequence coverage (usually >= 2x). It also utilizes the variant type information in the input files to select reads for assembly. Tigra is effective at improving the SV prediction accuracy and resolution in short reads analysis and can produce accurate breakpoint sequences that are useful to understand the origin, mechanism and pathology underlying the SVs.

TIGRA was initially developed at the Genome Institute of Washington University in St. Louis and was further developed at the University of Texas MD Anderson Cancer Center.

**Install**

Download and compile samtools-0.1.6 (http://samtools.sourceforge.net/) on your system.

Modify the Makefile to point to the samtools-0.1.6 folder on your system.

Type "make" and enter.

**Usage**

./tigra <SV file> [<a.bam> <b.bam> ...]

Options:

-l INT Assembly [500] bp from the SV breakpoints

-c STR Only assemble calls on chromosome [STR]

-o FILE Save assembly contigs to [FILE]

-s INT Only output contigs longer than [50] bp

-R FILE Path to the wildtype reference fasta

-r FILE Create pair-wise local reference sequence fastas in [FILE]

-w INT Pad local reference by additional [200] bp on both ends

-q INT Only assemble reads with mapping quality > [1]

-N INT Highlight segments supported by SVReads that differ from reference by at least [5] mismatches

-p INT Ignore cases that have average read depth greater than [1000]

-b The input file is in breakdancer format

-f Provide a text file containing rows of sample:bam mapping

-M INT Skip SVs shorter than [3] bp

-h INT Skip complex contig graphs with more than [100] nodes

Version: 0.3.7

**Input**

The minimally required input is a SV file.

As shown in the usage, a group of bam files can be specified in the commandline, or using the -f option.

TIGRA currently recognizes two types of input:

1. The 1000 Genomes format

The SV calls must be recorded in a tab-delimited format with the following columns:

CHR

START_OUTER

START_INNER

END_INNER

END_OUTER

TYPE_OF_EVENT

SIZE_PREDICTION

MAPPING_ALGORITHM

SEQUENCING_TECHNOLOGY

SAMPLEs

TYPE_OF_COMPUTATIONAL_APPROACH

GROUP

OPTIONAL_ID

It is critical to have accurate information in CHR,START_INNER,END_INNER,TYPE_OF_EVENT, SIZE_PREDICTION, and SAMPLES.

SAMPLEs should be the sample names separated by comma.

For example:

1 829757 829757 829865 829865 DEL 116 MAQ SLX NA19238,NA19240 RP WashU

To let the program know the association between location of the bam files and the sample names, use the -f option to specify a bam_list_file in the following key:value pairs:

sample_name:bam_file_location

with no space in between.

For example:

NA19238:1000genomes/ftp/data/NA19238/alignment/NA19238.chrom1.SLX.SRP000032.2009_07.bam

NA19240:1000genomes/ftp/data/NA19238/alignment/NA19240.chrom1.SLX.SRP000032.2009_07.bam

Each row can only declare only one sample.

Only the samples and the bams that contain the SV will be assembled.

2. BreakDancer format

Please use option -b to declare the BreakDancer format.

You can use either the long format, e.g.,

10 89690279 + 10 89702321 + DEL 12042 99 16 example1|16

10 85512695 + 10 85513886 + DEL 1191 99 18 example1|11:example2|7

or the short format, e.g.,

10 89690279 + 10 89702321 + DEL 12042

10 85512695 + 10 85513886 + DEL 1191

In the long format, column 11 must contain a list of samples and number of SV supporting reads in each sample, separated by ":" and by "|". The numbers of supporting reads can just be placeholders when they are not available, but the sample names (example1, example2) must be meaningful and match exactly with the sample names in the bam list file,

e.g.,

example1:example1.bam

example2:example2.bam

Column 11 is used in conjunction with the bam list to selectively assemble the subset of bams that may contain the predicted SV. For example, the first deletion above will be assembled using reads from example1 and the second using reads from both example1 and example2.

When the short format is used, all the bams specified in the bamlist and by the command line argument will be used. The set of bams specified in the bamlist have higher precedence than those specified through the commandline arguments.

**SV types**

TIGRA can currently assemble the following type of SVs:

DEL: deletion;

INS: insertion;

ITX: tandem duplication;

CTX: transchromosomal translocation.

Notice that in the BreakDancer file, the SVs are already recorded in these 3-letter abbreviations. For the 1000 Genomes format, please ensure that the TYPE columns use the same terminologies.

**Additional comments on the usages**

-R

If you'd like to see if part of the contigs are novel relative to the reference, i.e., supported by unmapped or poorly mapped reads, please provide the program with the samtools faidxed reference file with -R option followed by the full path. The novel part of the contigs will be in CAPITAL letters, while the parts identical to the reference will be in lower case. This feature facilitates consistency analysis with split-reads type of algorithm (such as Pindel) that directly examines unmapped or poorly mapped reads. It could also help genotyping algorithms observing reads spanning the breakpoints.

-N

Use in conjunction with -R to define the set of poorly mapped reads

-c

If you'd like to parallelize the jobs by chromosome, please use option -c followed by the chromosome id, so that the program will skip the other chromosomes for this job. Please make sure that the bams in bam_list_file contains the chromosome of interest.

-r

Use in conjunction with -R. This is useful when you want to obtain a fasta file that contains a matched set of local wild-type sequences for breakpoint annotation.

**Example commands**

1. Assemble SVs using example1.bam

*tigra -b -R NCBI36.example.fa -o output1.fa example.breakdancer.sv example1.bam 2> output1.log*

2. Assemble SVs from a list of bam files

*tigra -b -R NCBI36.example.fa -o output2.fa -f example.bamlist example.breakdancer.sv 2> output2.log*

#Contact

Ken Chen (kchen3@mdanderson.org)

#Acknowledgement

MD Anderson Cancer Center

Washington University in St. Louis

The 1000 Genomes Pro
