# Supplementary material for: TIGRA: A targeted iterative graph routing assembler for breakpoint assembly
Source: HighWire-hosted journal article supplement (doi:10.1101/gr.162883.113), 2013-12-04
Supplement: Supplemental_Table1.xlsx [file Supplemental_Table1.xlsx]

## Sheet: CEU.low_coverage.2010_06.deleti
Chr1	Pos1	Chr2	Pos2	Type	Size	Genotypes in 45 CEU samples	ID in Conrad et al (2010)
1	10405068	1	10406367	DEL	1299	NA06994|1:NA07000|1:NA07037|2:NA07051|2:NA07347|1:NA07357|1:NA11829|1:NA11919|2:NA11992|2:NA11995|1:NA12003|1:NA12006|1:NA12044|1:NA12045|1:NA12144|1:NA12155|1:NA12287|1:NA12749|1:NA12750|2:NA12751|1:NA12763|1:NA12776|1:NA12828|1:NA12878|1:NA12892|1	CNVR65.1
1	14309660	1	14311527	DEL	1867	NA06986|1:NA06994|1:NA07000|2:NA07051|1:NA11881|1:NA11920|1:NA11931|1:NA11994|1:NA11995|2:NA12043|2:NA12044|1:NA12144|1:NA12154|2:NA12155|2:NA12249|1:NA12489|1:NA12749|1:NA12750|1:NA12776|1:NA12813|1:NA12828|1	CNVR81.1
1	30511210	1	30512521	DEL	1311	NA07051|1:NA11920|1:NA12044|1:NA12249|1:NA12489|1:NA12716|1:NA12750|1:NA12751|1:NA12813|1:NA12892|1	CNVR126.1
1	61855451	1	61856295	DEL	844	NA06986|1:NA06994|1:NA07037|1:NA07346|2:NA07347|2:NA07357|1:NA11829|1:NA11831|2:NA11881|1:NA11918|1:NA11920|1:NA11993|1:NA11994|1:NA12006|1:NA12043|1:NA12144|1:NA12154|1:NA12249|1:NA12287|2:NA12489|1:NA12716|1:NA12751|1:NA12761|1:NA12776|1:NA12813|1:NA12828|1	CNVR199.1
1	72538911	1	72584426	DEL	45515	NA06986|1:NA06994|2:NA07000|1:NA07037|2:NA07051|2:NA07346|2:NA07347|1:NA07357|2:NA11829|2:NA11830|1:NA11831|2:NA11881|2:NA11894|1:NA11919|1:NA11931|2:NA11992|1:NA11993|2:NA11994|1:NA11995|2:NA12003|1:NA12006|1:NA12043|1:NA12044|1:NA12045|1:NA12144|2:NA12154|2:NA12155|2:NA12249|1:NA12287|2:NA12489|2:NA12716|2:NA12749|2:NA12750|2:NA12751|1:NA12761|1:NA12763|1:NA12813|2:NA12828|2:NA12878|2:NA12891|2…	CNVR217.1
1	92004649	1	92005921	DEL	1272	NA07346|2:NA07357|2:NA11831|1:NA11881|1:NA11894|1:NA11918|2:NA11919|1:NA11920|1:NA11931|1:NA11993|1:NA11995|1:NA12003|1:NA12006|1:NA12044|1:NA12154|1:NA12156|1:NA12249|1:NA12287|1:NA12489|2:NA12750|1:NA12761|1:NA12763|1:NA12813|2:NA12828|1:NA12878|1:NA12892|2	CNVR250.1
1	104244722	1	104245248	DEL	526	NA07346|1:NA07347|1:NA07357|2:NA11829|1:NA11831|1:NA11894|1:NA11919|2:NA11992|1:NA11993|1:NA12003|1:NA12006|1:NA12043|1:NA12045|1:NA12144|1:NA12154|1:NA12156|1:NA12287|1:NA12489|2:NA12716|1:NA12750|1:NA12751|1:NA12761|2:NA12763|1:NA12776|1:NA12813|2:NA12828|1	CNVR267.1
1	105817334	1	105824920	DEL	7586	NA07000|1:NA07051|1:NA07346|1:NA07347|2:NA11829|2:NA11830|1:NA11881|1:NA11894|2:NA11918|1:NA11920|1:NA11992|1:NA11993|1:NA11994|1:NA12006|1:NA12044|2:NA12144|1:NA12249|2:NA12751|1:NA12813|2	CNVR275.1
1	116031009	1	116034366	DEL	3357	NA06986|2:NA06994|1:NA07037|1:NA07357|1:NA11829|1:NA11831|1:NA11918|1:NA11919|1:NA11920|1:NA11931|1:NA11994|2:NA12006|1:NA12044|1:NA12045|1:NA12144|1:NA12154|1:NA12155|2:NA12156|1:NA12249|1:NA12287|1:NA12749|1:NA12751|1:NA12813|1:NA12828|1:NA12878|1:NA12891|1	CNVR308.1
1	155440488	1	155442021	DEL	1533	NA07000|1:NA11829|1:NA11830|1:NA11920|1:NA11931|1:NA11994|1:NA12003|1:NA12761|2:NA12776|1:NA12891|1	CNVR372.1
1	157134157	1	157136608	DEL	2451	NA06986|1:NA06994|2:NA07000|1:NA07037|1:NA07346|2:NA07347|2:NA07357|2:NA11830|1:NA11831|2:NA11881|1:NA11894|1:NA11918|1:NA11919|2:NA11920|1:NA11931|2:NA11992|1:NA11993|2:NA11994|1:NA11995|1:NA12003|2:NA12006|2:NA12043|2:NA12044|1:NA12045|1:NA12144|1:NA12154|2:NA12155|1:NA12156|1:NA12249|1:NA12287|2:NA12489|2:NA12749|1:NA12750|2:NA12751|1:NA12761|2:NA12763|2:NA12776|1:NA12813|2:NA12828|1:NA12878|2…	CNVR376.1
1	157915332	1	157916282	DEL	950	NA06986|2:NA06994|1:NA07000|2:NA07037|1:NA07051|2:NA07346|2:NA07347|1:NA07357|1:NA11829|2:NA11830|2:NA11831|2:NA11881|1:NA11894|2:NA11918|1:NA11920|1:NA11931|2:NA11992|2:NA11993|2:NA11994|2:NA11995|2:NA12006|2:NA12043|2:NA12044|1:NA12045|1:NA12144|1:NA12154|1:NA12155|1:NA12156|1:NA12249|1:NA12287|2:NA12489|2:NA12716|2:NA12749|1:NA12750|1:NA12751|2:NA12761|2:NA12776|2:NA12813|1:NA12828|1:NA12878|1…	CNVR381.1
1	167270985	1	167271856	DEL	871	NA06986|1:NA07037|1:NA07051|1:NA11831|1:NA11919|1:NA11931|1:NA11995|1:NA12044|1:NA12045|1:NA12144|1:NA12154|1:NA12156|1:NA12716|1:NA12751|1:NA12761|1:NA12763|1:NA12776|1:NA12813|1	CNVR397.1
1	177873904	1	177874682	DEL	778	NA06994|1:NA07000|1:NA07037|1:NA07051|1:NA07347|1:NA07357|2:NA11829|1:NA11830|1:NA11831|1:NA11881|1:NA11918|2:NA11931|1:NA11992|1:NA11993|1:NA11994|1:NA12006|2:NA12043|1:NA12045|1:NA12156|1:NA12249|2:NA12287|2:NA12489|1:NA12749|1:NA12763|1:NA12776|1:NA12813|1	CNVR416.1
1	183276429	1	183278361	DEL	1932	NA11831|1:NA12043|1:NA12878|1:NA12891|1	CNVR428.1
1	185982726	1	185989156	DEL	6430	NA06994|2:NA07000|2:NA07037|1:NA07051|1:NA07347|2:NA07357|1:NA11830|1:NA11831|1:NA11881|2:NA11894|1:NA11918|1:NA11919|1:NA11920|1:NA11931|1:NA11992|2:NA11994|1:NA11995|1:NA12003|2:NA12006|1:NA12043|1:NA12044|1:NA12144|2:NA12155|1:NA12249|1:NA12716|1:NA12749|1:NA12750|2:NA12751|2:NA12761|2:NA12763|1:NA12776|1:NA12813|1:NA12828|1:NA12878|2:NA12891|2:NA12892|1	CNVR432.1
1	197040372	1	197042037	DEL	1665	NA07037|1:NA07051|1:NA07346|1:NA07347|1:NA07357|1:NA11830|1:NA11831|1:NA11881|2:NA11894|1:NA11918|1:NA11992|1:NA11994|1:NA12006|1:NA12045|2:NA12144|1:NA12154|1:NA12155|1:NA12156|1:NA12249|1:NA12749|1:NA12750|1:NA12751|1:NA12761|1:NA12763|1:NA12813|1:NA12828|1:NA12891|1	CNVR461.1
1	197830642	1	197833268	DEL	2626	NA07037|1:NA07357|1:NA12489|1	CNVR464.1
1	208144678	1	208152600	DEL	7922	NA06986|2:NA06994|1:NA07000|1:NA07037|1:NA07051|2:NA07346|1:NA07347|1:NA07357|1:NA11829|1:NA11830|1:NA11831|1:NA11918|1:NA11919|1:NA11920|1:NA11931|1:NA11992|1:NA11993|2:NA11994|1:NA11995|1:NA12006|1:NA12043|1:NA12045|1:NA12144|1:NA12154|1:NA12155|2:NA12156|1:NA12249|1:NA12287|2:NA12489|1:NA12749|1:NA12750|1:NA12751|2:NA12763|1:NA12776|1:NA12813|2:NA12828|1:NA12892|1	CNVR490.1
1	208789083	1	208791504	DEL	2421	NA06994|1:NA11918|1	CNVR491.1
10	4280063	10	4281683	DEL	1620	NA06986|1:NA06994|2:NA07000|2:NA07037|1:NA07051|2:NA07346|1:NA07347|2:NA07357|2:NA11829|2:NA11830|2:NA11831|1:NA11881|2:NA11894|2:NA11918|2:NA11919|2:NA11920|2:NA11931|2:NA11992|1:NA11993|2:NA11994|2:NA11995|1:NA12003|2:NA12006|2:NA12043|1:NA12044|2:NA12045|1:NA12144|2:NA12154|1:NA12155|2:NA12156|2:NA12249|2:NA12287|1:NA12489|2:NA12716|2:NA12749|2:NA12750|2:NA12751|2:NA12761|2:NA12763|2:NA12776|1…	CNVR4594.1
10	4698520	10	4700525	DEL	2005	NA06986|2:NA06994|2:NA07000|2:NA07037|1:NA07051|2:NA07347|1:NA07357|2:NA11829|2:NA11830|2:NA11831|1:NA11881|2:NA11894|1:NA11918|2:NA11919|2:NA11920|2:NA11931|2:NA11992|1:NA11993|2:NA11995|2:NA12003|2:NA12006|2:NA12044|2:NA12045|1:NA12144|2:NA12154|1:NA12155|2:NA12156|2:NA12249|2:NA12287|2:NA12489|2:NA12716|2:NA12749|2:NA12750|2:NA12751|2:NA12761|1:NA12776|2:NA12828|1:NA12878|1:NA12891|2:NA12892|1	CNVR4596.1
10	7117046	10	7118307	DEL	1261	NA06986|1:NA06994|2:NA07000|1:NA07037|2:NA07051|1:NA07346|1:NA07347|1:NA11829|1:NA11830|1:NA11831|1:NA11881|1:NA11918|2:NA11919|1:NA11920|1:NA11992|1:NA11994|1:NA12003|1:NA12006|1:NA12043|1:NA12044|1:NA12045|1:NA12287|2:NA12489|1:NA12749|1:NA12750|2:NA12761|1:NA12763|1:NA12776|1:NA12813|2:NA12878|1:NA12891|1:NA12892|1	CNVR4609.1
10	58879793	10	58881859	DEL	2066	NA07037|1:NA07346|1:NA07347|1:NA11831|1:NA11992|1:NA11994|1:NA12003|1:NA12043|1:NA12044|2:NA12156|1:NA12287|1:NA12749|1:NA12750|1:NA12751|2:NA12763|1:NA12878|1:NA12891|1:NA12892|2	CNVR4760.1
10	61031970	10	61035014	DEL	3044	NA07037|1:NA11831|2:NA11992|1:NA11993|2:NA12003|1:NA12006|1:NA12144|1:NA12155|1:NA12892|1	CNVR4767.1
10	65179256	10	65181407	DEL	2151	NA07346|1:NA11829|1:NA11881|1:NA11894|1:NA11919|1:NA11920|1:NA11931|1:NA11994|1:NA11995|1:NA12043|1:NA12044|1:NA12045|1:NA12144|1:NA12155|1:NA12287|1:NA12749|2:NA12750|1:NA12763|1:NA12776|1:NA12813|1:NA12828|1:NA12878|1:NA12891|2	CNVR4773.1
10	66068780	10	66070754	DEL	1974	NA06986|1:NA06994|1:NA07346|2:NA07357|1:NA11831|1:NA11918|1:NA11919|1:NA11992|1:NA11993|1:NA11994|1:NA12003|2:NA12045|1:NA12144|1:NA12287|1:NA12716|1:NA12813|2:NA12828|1	CNVR4776.1
10	66976940	10	66985302	DEL	8362	NA06986|1:NA07000|1:NA07037|1:NA07346|1:NA07347|1:NA11830|1:NA11831|2:NA11894|1:NA11992|1:NA11994|1:NA12043|1:NA12044|1:NA12155|1:NA12249|1:NA12489|1:NA12750|2:NA12763|1:NA12776|1:NA12813|2:NA12828|1:NA12892|1	CNVR4779.1
10	93623318	10	93624545	DEL	1227	NA06986|1:NA06994|1:NA07037|2:NA07346|1:NA07347|1:NA11829|2:NA11830|2:NA11831|1:NA11881|1:NA11894|1:NA11919|2:NA11920|2:NA11931|1:NA11993|1:NA12003|1:NA12043|1:NA12144|1:NA12154|1:NA12155|1:NA12156|2:NA12249|1:NA12287|1:NA12489|1:NA12749|1:NA12750|1:NA12751|1:NA12763|1:NA12776|2:NA12813|1:NA12828|1:NA12878|1:NA12891|2	CNVR4855.1
10	107940672	10	107941586	DEL	914	NA06986|1:NA06994|2:NA07000|1:NA07037|2:NA07051|2:NA07346|2:NA07347|2:NA07357|2:NA11829|1:NA11830|2:NA11831|2:NA11881|1:NA11894|2:NA11918|2:NA11920|2:NA11931|2:NA11992|2:NA11993|2:NA11994|2:NA11995|2:NA12003|2:NA12006|2:NA12043|2:NA12044|2:NA12045|2:NA12144|1:NA12154|2:NA12155|2:NA12156|1:NA12249|2:NA12489|2:NA12749|2:NA12750|2:NA12751|2:NA12761|2:NA12763|2:NA12776|2:NA12828|2:NA12878|2:NA12891|2…	CNVR4884.1
10	108020308	10	108022533	DEL	2225	NA06986|2:NA06994|1:NA07000|2:NA07037|2:NA07346|2:NA07347|2:NA07357|1:NA11830|2:NA11831|2:NA11918|1:NA11919|1:NA11920|2:NA11931|2:NA11992|1:NA11993|1:NA11994|2:NA12003|1:NA12006|2:NA12144|2:NA12154|1:NA12155|2:NA12156|2:NA12249|2:NA12287|1:NA12489|2:NA12716|1:NA12750|1:NA12751|2:NA12761|1:NA12763|2:NA12776|2:NA12813|1:NA12828|1:NA12878|1:NA12891|1:NA12892|2	CNVR4886.1
10	114102173	10	114106650	DEL	4477	NA06986|1:NA06994|1:NA07000|1:NA07037|2:NA07051|1:NA07346|1:NA07357|1:NA11829|1:NA11830|1:NA11881|1:NA11894|2:NA11919|1:NA11931|1:NA11992|2:NA11993|2:NA11995|1:NA12003|1:NA12043|1:NA12045|1:NA12154|1:NA12155|2:NA12156|1:NA12489|1:NA12749|1:NA12750|1:NA12761|2:NA12763|1:NA12776|1:NA12878|2:NA12891|1:NA12892|2	CNVR4893.1
10	132799052	10	132802769	DEL	3717	NA07000|2:NA07037|1:NA07051|1:NA07346|1:NA07357|1:NA11831|1:NA11918|1:NA11931|1:NA11992|1:NA11993|1:NA12003|1:NA12155|1:NA12249|1:NA12287|1:NA12716|1:NA12813|1:NA12878|1:NA12891|1	CNVR4949.1
11	5478208	11	5479749	DEL	1541	NA07000|1:NA07037|1:NA11994|1:NA12044|1:NA12144|1:NA12156|2:NA12716|1:NA12828|1	CNVR5044.1
11	5716663	11	5718941	DEL	2278	NA06986|1:NA07000|2:NA07051|1:NA07346|1:NA07347|1:NA07357|2:NA11830|1:NA11881|1:NA11919|1:NA11920|1:NA11931|1:NA11992|1:NA11993|1:NA11995|2:NA12003|1:NA12006|1:NA12045|1:NA12154|1:NA12716|1:NA12750|1:NA12776|1:NA12813|1:NA12828|1:NA12878|1:NA12891|1:NA12892|1	CNVR5048.1
11	5741151	11	5765860	DEL	24709	NA06986|1:NA11931|1:NA11993|1:NA11994|1:NA11995|2:NA12003|1:NA12144|1:NA12155|1:NA12716|1:NA12749|2:NA12750|1:NA12751|1:NA12761|1:NA12776|1:NA12813|1:NA12828|1	CNVR5049.1
11	7091294	11	7093075	DEL	1781	NA07000|1:NA07037|1:NA12776|1	CNVR5056.1
11	11336197	11	11337606	DEL	1409	NA07000|1:NA07051|2:NA07346|1:NA11831|2:NA11881|1:NA11993|1:NA11995|2:NA12003|1:NA12006|1:NA12044|1:NA12144|1:NA12154|1:NA12155|2:NA12249|1:NA12287|1:NA12749|1:NA12750|1:NA12776|1:NA12813|1:NA12828|2:NA12892|1	CNVR5072.1
11	22427462	11	22429349	DEL	1887	NA12878|1:NA12891|1	CNVR5103.1
11	45386425	11	45388192	DEL	1767	NA06986|2:NA06994|2:NA07000|1:NA07037|2:NA07347|2:NA07357|1:NA11829|2:NA11881|1:NA11918|1:NA11919|2:NA11920|1:NA11992|2:NA11993|2:NA11995|1:NA12003|2:NA12154|1:NA12155|2:NA12156|2:NA12716|1:NA12750|1:NA12751|1:NA12761|1:NA12776|2:NA12813|1:NA12828|1:NA12878|2:NA12891|2:NA12892|1	CNVR5158.1
11	47014165	11	47020283	DEL	6118	NA06994|2:NA07000|2:NA07037|1:NA07347|1:NA07357|1:NA11830|1:NA11831|1:NA11881|1:NA11918|1:NA11920|1:NA11931|1:NA11992|2:NA11993|2:NA11994|1:NA11995|1:NA12003|1:NA12006|1:NA12044|1:NA12144|1:NA12154|2:NA12156|1:NA12249|1:NA12287|1:NA12489|2:NA12716|1:NA12751|1:NA12761|1:NA12763|1:NA12813|2:NA12828|1:NA12878|2:NA12891|2:NA12892|1	CNVR5162.1
11	48557434	11	48560860	DEL	3426	NA06994|2:NA07000|1:NA07037|1:NA07346|1:NA07347|1:NA07357|1:NA11829|1:NA11830|2:NA11831|1:NA11881|1:NA11894|2:NA11918|2:NA11920|2:NA11931|1:NA11992|1:NA11993|2:NA11994|1:NA11995|2:NA12003|1:NA12006|1:NA12043|1:NA12045|1:NA12144|2:NA12154|1:NA12155|1:NA12156|1:NA12249|2:NA12287|2:NA12489|1:NA12716|2:NA12749|1:NA12750|1:NA12751|2:NA12761|2:NA12763|2:NA12776|2:NA12813|1:NA12828|2:NA12878|2:NA12891|2…	CNVR5165.1
11	58388350	11	58393131	DEL	4781	NA07346|1:NA11831|1:NA11931|1:NA12003|1:NA12249|2:NA12489|1:NA12776|1	CNVR5189.1
11	69660203	11	69662138	DEL	1935	NA07000|1:NA07037|1:NA07346|1:NA07357|1:NA11995|1:NA12156|1:NA12249|1:NA12750|1:NA12763|1	CNVR5218.1
11	85981878	11	85984206	DEL	2328	NA06986|1:NA11831|1:NA11995|1:NA12045|1:NA12155|1	CNVR5255.1
11	95641573	11	95643043	DEL	1470	NA07357|1:NA11881|1:NA11918|2:NA12003|1:NA12154|2:NA12489|1:NA12749|1:NA12751|1	CNVR5278.1
11	103772961	11	103778439	DEL	5478	NA06986|1:NA06994|1:NA07000|2:NA07037|2:NA07051|1:NA07346|2:NA07347|1:NA07357|2:NA11829|1:NA11830|1:NA11831|1:NA11881|2:NA11919|1:NA11920|2:NA11931|1:NA11995|2:NA12006|1:NA12043|2:NA12044|2:NA12045|1:NA12144|1:NA12155|2:NA12156|2:NA12249|2:NA12287|1:NA12489|1:NA12716|2:NA12749|1:NA12750|1:NA12751|2:NA12761|1:NA12763|1:NA12776|2:NA12813|2:NA12828|1:NA12878|2:NA12891|2:NA12892|2	CNVR5294.1
11	128187926	11	128188620	DEL	694	NA07000|1:NA07037|1:NA07051|1:NA07347|1:NA11830|1:NA11919|1:NA11992|2:NA11993|1:NA11994|1:NA11995|1:NA12003|1:NA12043|1:NA12155|1:NA12156|1:NA12287|1:NA12749|1:NA12750|1:NA12751|1:NA12776|2:NA12813|2:NA12828|1:NA12891|1	CNVR5351.1
11	134107192	11	134112875	DEL	5683	NA07346|1:NA07357|1:NA11920|1:NA11993|1:NA12003|1:NA12044|2:NA12144|1:NA12287|1:NA12776|1:NA12828|1:NA12878|1:NA12892|1	CNVR5372.1
11	134238110	11	134239324	DEL	1214	NA07051|1:NA07346|1:NA07357|1:NA11831|1:NA11881|2:NA11894|1:NA11919|1:NA12156|1:NA12249|2:NA12489|1	CNVR5375.1
12	247761	12	255094	DEL	7333	NA12878|1:NA12891|1	CNVR5382.1
12	5092083	12	5093713	DEL	1630	NA07000|1:NA07346|1:NA11830|1:NA11918|1:NA11994|1:NA12776|1:NA12813|1:NA12828|1:NA12891|1:NA12892|1	CNVR5408.1
12	6111699	12	6118340	DEL	6641	NA07000|1:NA07357|1:NA11995|1:NA12156|1:NA12750|1:NA12761|1	CNVR5412.1
12	11917682	12	11918420	DEL	738	NA06986|1:NA06994|1:NA07000|1:NA07051|1:NA07347|1:NA11829|1:NA11881|1:NA11894|2:NA11918|1:NA11920|1:NA11992|1:NA11993|1:NA11994|2:NA12044|2:NA12045|1:NA12144|1:NA12154|1:NA12249|1:NA12287|2:NA12489|1:NA12751|1:NA12763|2:NA12776|1:NA12828|1:NA12892|1	CNVR5436.1
12	23830789	12	23831356	DEL	567	NA06986|1:NA11830|1:NA11881|1:NA11920|1:NA12003|1:NA12045|1:NA12750|1:NA12763|1:NA12813|2:NA12878|2:NA12891|1:NA12892|1	CNVR5458.1
12	33606390	12	33608237	DEL	1847	NA07000|1:NA07051|1:NA07357|1:NA11831|1:NA11918|1:NA11994|1:NA12043|1:NA12249|1:NA12489|1:NA12761|1:NA12763|1:NA12776|1:NA12813|1:NA12892|1	CNVR5492.1
12	58808112	12	58811308	DEL	3196	NA06986|2:NA07051|2:NA07346|1:NA07347|1:NA07357|1:NA11829|1:NA11831|1:NA11894|1:NA11918|1:NA11919|1:NA11931|1:NA11992|1:NA11993|1:NA11995|2:NA12003|1:NA12006|2:NA12044|1:NA12144|2:NA12154|2:NA12156|2:NA12249|1:NA12287|1:NA12489|2:NA12749|1:NA12750|1:NA12751|1:NA12761|1:NA12763|1:NA12776|1:NA12813|1:NA12828|1:NA12891|1:NA12892|1	CNVR5559.1
12	69158533	12	69164484	DEL	5951	NA06986|2:NA07346|1:NA07357|1:NA11829|1:NA11830|1:NA11920|1:NA11931|1:NA12003|1:NA12045|1:NA12155|1:NA12489|1:NA12750|1:NA12751|2	CNVR5582.1
12	83117245	12	83120148	DEL	2903	NA06994|1:NA07346|1:NA07347|1:NA11829|1:NA11830|1:NA11881|1:NA11894|1:NA11918|1:NA11919|1:NA11992|1:NA11993|1:NA11994|1:NA12003|1:NA12044|2:NA12045|1:NA12144|1:NA12155|2:NA12489|1:NA12750|1:NA12761|1:NA12828|2:NA12878|2:NA12891|2:NA12892|1	CNVR5607.1
12	98318079	12	98326901	DEL	8822	NA07051|1:NA11931|1:NA12144|2:NA12749|1:NA12750|1:NA12776|1:NA12878|1:NA12892|1	CNVR5639.1
12	100626541	12	100631221	DEL	4680	NA06986|1:NA07051|1:NA07346|1:NA11881|1:NA11918|1:NA11931|1:NA11993|1:NA12045|1:NA12489|1:NA12763|1:NA12878|1:NA12891|1	CNVR5644.1
13	33033730	13	33042821	DEL	9091	NA07037|1:NA07051|1:NA11894|1:NA11920|1:NA12043|1:NA12144|1:NA12154|1:NA12249|1:NA12287|1:NA12751|2:NA12763|1:NA12776|1	CNVR5837.1
13	37955319	13	37958205	DEL	2886	NA06986|1:NA06994|2:NA07000|1:NA07037|2:NA07051|1:NA07346|2:NA07347|1:NA07357|2:NA11829|1:NA11830|2:NA11831|2:NA11881|2:NA11894|2:NA11919|2:NA11920|1:NA11931|2:NA11992|2:NA11994|1:NA11995|1:NA12003|2:NA12006|2:NA12043|2:NA12044|2:NA12144|1:NA12154|2:NA12156|1:NA12249|2:NA12287|2:NA12489|1:NA12716|1:NA12749|2:NA12750|2:NA12751|2:NA12761|1:NA12763|2:NA12776|2:NA12813|2:NA12828|1:NA12878|1:NA12891|1…	CNVR5850.1
13	69633730	13	69673451	DEL	39721	NA07000|1:NA11931|1	CNVR5918.1
13	71375261	13	71378578	DEL	3317	NA06986|1:NA06994|2:NA07000|1:NA07037|1:NA07346|2:NA07357|2:NA11830|1:NA11831|2:NA11881|2:NA11918|2:NA11919|1:NA11993|1:NA11994|2:NA11995|2:NA12006|2:NA12043|1:NA12044|2:NA12045|2:NA12144|2:NA12154|1:NA12287|1:NA12489|1:NA12716|1:NA12749|2:NA12750|1:NA12751|1:NA12761|1:NA12813|2:NA12828|1:NA12878|2:NA12891|2:NA12892|2	CNVR5920.1
13	88219968	13	88220938	DEL	970	NA07000|1:NA11995|2:NA12003|1:NA12006|1:NA12750|1:NA12776|1:NA12892|1	CNVR5960.1
13	89660856	13	89662812	DEL	1956	NA06986|1:NA06994|1:NA07000|2:NA07037|1:NA07051|2:NA07346|1:NA11831|1:NA11881|1:NA11894|2:NA11918|2:NA11919|1:NA11920|1:NA11931|2:NA11992|2:NA11993|1:NA11994|1:NA11995|1:NA12043|2:NA12144|1:NA12155|1:NA12156|1:NA12249|1:NA12287|2:NA12489|1:NA12749|1:NA12750|2:NA12763|2:NA12776|1:NA12813|1:NA12828|1:NA12891|1	CNVR5962.1
14	21951507	14	21952100	DEL	593	NA06994|1:NA07000|2:NA07037|1:NA07051|1:NA07346|2:NA07347|2:NA07357|1:NA11829|1:NA11830|2:NA11831|2:NA11881|2:NA11894|1:NA11918|2:NA11919|2:NA11920|1:NA11992|2:NA11993|2:NA11994|2:NA12006|2:NA12044|2:NA12045|1:NA12144|2:NA12154|1:NA12156|2:NA12249|1:NA12489|2:NA12749|1:NA12750|1:NA12751|1:NA12761|2:NA12763|1:NA12776|2:NA12813|2:NA12828|2:NA12891|1:NA12892|1	CNVR6084.1
14	39679566	14	39687423	DEL	7857	NA06986|1:NA06994|2:NA07000|1:NA07037|1:NA07051|1:NA07347|1:NA07357|2:NA11830|2:NA11831|2:NA11881|1:NA11894|2:NA11918|2:NA11919|2:NA11920|1:NA11931|1:NA11992|2:NA11993|1:NA11995|1:NA12006|2:NA12044|2:NA12045|2:NA12144|2:NA12154|1:NA12156|2:NA12249|1:NA12287|2:NA12489|1:NA12716|1:NA12749|2:NA12750|2:NA12751|2:NA12761|1:NA12776|2:NA12828|1:NA12878|2:NA12891|1:NA12892|2	CNVR6133.1
14	42057278	14	42062684	DEL	5406	NA07346|1:NA11918|1:NA12144|1:NA12287|1:NA12750|1:NA12751|1:NA12813|1	CNVR6140.1
14	53780099	14	53783438	DEL	3339	NA07000|2:NA07346|1:NA07357|1:NA11829|1:NA11830|2:NA11894|1:NA11920|1:NA11992|1:NA12006|1:NA12043|1:NA12155|1:NA12249|1:NA12287|2:NA12489|1:NA12716|1:NA12749|1:NA12751|1:NA12763|1:NA12776|1:NA12891|1	CNVR6158.1
14	69086749	14	69092243	DEL	5494	NA06994|1:NA07346|1:NA11831|1:NA11919|1:NA11920|1:NA11995|1:NA12044|1:NA12144|1:NA12287|1:NA12749|1:NA12750|1:NA12828|1	CNVR6178.1
14	79176043	14	79184853	DEL	8810	NA06986|1:NA07346|2:NA07357|2:NA11881|1:NA11894|1:NA11931|1:NA11993|1:NA11994|1:NA12003|1:NA12044|1:NA12045|2:NA12154|1:NA12155|1:NA12249|1:NA12489|1:NA12716|1:NA12749|1:NA12761|1:NA12776|2:NA12813|1:NA12828|1:NA12878|1:NA12891|1	CNVR6203.1
14	80947966	14	80950367	DEL	2401	NA06986|1:NA07037|1:NA07051|1:NA07346|1:NA07347|1:NA11918|1:NA11919|1:NA11993|1:NA11994|1:NA12043|1:NA12045|2:NA12489|1:NA12763|1:NA12776|1	CNVR6209.1
14	81568863	14	81573083	DEL	4220	NA06986|1:NA06994|2:NA07000|2:NA07051|2:NA07346|1:NA07347|2:NA07357|2:NA11830|1:NA11831|2:NA11881|1:NA11918|1:NA11919|2:NA11920|1:NA11931|2:NA11992|1:NA11994|2:NA11995|2:NA12006|1:NA12043|2:NA12044|2:NA12045|1:NA12144|2:NA12154|2:NA12155|2:NA12249|1:NA12287|1:NA12489|2:NA12716|1:NA12749|1:NA12761|2:NA12763|2:NA12776|1:NA12813|2:NA12828|2:NA12878|2:NA12891|2:NA12892|2	CNVR6211.1
14	84366869	14	84371916	DEL	5047	NA07037|1:NA07051|1:NA11881|1:NA11894|2:NA11919|1:NA11931|1:NA11992|1:NA11993|1:NA11995|1:NA12003|1:NA12043|1:NA12155|2:NA12156|1:NA12489|1:NA12716|1:NA12749|1:NA12750|1:NA12813|2:NA12828|2	CNVR6220.1
15	21606470	15	21612738	DEL	6268	NA11995|1:NA12750|1	CNVR6306.1
15	33947426	15	33949511	DEL	2085	NA07347|1:NA07357|1:NA11831|1:NA11931|1:NA12043|2:NA12044|1:NA12156|1:NA12761|1	CNVR6355.1
15	60493387	15	60495087	DEL	1700	NA07037|1:NA07051|1:NA11829|1:NA11918|1:NA12006|1:NA12044|1:NA12489|1:NA12749|1:NA12751|1:NA12891|1	CNVR6418.1
15	69495663	15	69500744	DEL	5081	NA06994|2:NA07037|2:NA07051|2:NA07346|2:NA07347|1:NA07357|2:NA11830|2:NA11831|2:NA11881|1:NA11894|2:NA11918|1:NA11920|2:NA11931|2:NA11992|1:NA11994|2:NA11995|2:NA12003|1:NA12006|1:NA12044|1:NA12045|1:NA12144|2:NA12154|2:NA12155|2:NA12156|2:NA12249|1:NA12287|1:NA12716|1:NA12750|1:NA12761|2:NA12763|1:NA12813|1:NA12828|1:NA12878|1:NA12892|2	CNVR6438.1
15	69668624	15	69670021	DEL	1397	NA06986|1:NA07037|1:NA07051|1:NA07346|1:NA07347|1:NA07357|1:NA11829|1:NA11919|2:NA11920|1:NA11931|2:NA11992|1:NA11993|1:NA11994|1:NA12006|1:NA12044|1:NA12144|1:NA12249|1:NA12287|1:NA12489|1:NA12716|1:NA12749|1:NA12750|1:NA12751|1:NA12761|1:NA12763|1:NA12776|1:NA12813|1:NA12828|1	CNVR6439.1
15	82332438	15	82334852	DEL	2414	NA07000|1:NA07347|1:NA07357|1:NA12003|1:NA12155|1:NA12813|1:NA12878|1:NA12892|2	CNVR6484.1
15	97474127	15	97474924	DEL	797	NA06986|1:NA07037|1:NA07051|1:NA11829|1:NA11894|1:NA11992|1:NA11993|2:NA11994|1:NA11995|1:NA12044|1:NA12154|1:NA12287|1	CNVR6543.1
15	99159013	15	99159896	DEL	883	NA07346|1:NA07347|1:NA11830|1:NA11881|1:NA12144|1:NA12763|1:NA12813|1:NA12878|1:NA12892|1	CNVR6552.1
16	13201968	16	13203997	DEL	2029	NA07000|1:NA07037|1:NA07051|1:NA07346|2:NA11829|1:NA11830|1:NA11881|1:NA11918|1:NA11920|1:NA11992|1:NA11993|1:NA11995|1:NA12003|1:NA12006|1:NA12249|1:NA12287|1:NA12489|1:NA12763|1:NA12878|1:NA12891|1	CNVR6642.1
16	22955276	16	22957032	DEL	1756	NA06986|1:NA06994|2:NA07000|2:NA07051|1:NA07346|2:NA07347|1:NA07357|1:NA11829|1:NA11830|1:NA11831|2:NA11881|1:NA11894|1:NA11918|2:NA11920|2:NA11931|2:NA11992|1:NA11993|1:NA11994|2:NA11995|1:NA12003|1:NA12043|1:NA12044|1:NA12045|2:NA12144|2:NA12154|1:NA12155|2:NA12156|1:NA12249|2:NA12287|1:NA12489|1:NA12716|2:NA12749|2:NA12750|2:NA12751|2:NA12761|2:NA12763|1:NA12813|1:NA12828|1:NA12878|2:NA12891|2…	CNVR6670.1
16	55923812	16	55924619	DEL	807	NA07000|1:NA07037|1:NA07357|1:NA11830|1:NA11831|1:NA11881|1:NA11894|2:NA11931|1:NA11994|1:NA12144|2:NA12154|1:NA12155|1:NA12716|1:NA12749|1:NA12751|1:NA12761|1:NA12776|1:NA12813|1:NA12878|2:NA12891|1:NA12892|2	CNVR6737.1
16	61101835	16	61108169	DEL	6334	NA12155|1:NA12156|1:NA12749|1:NA12750|1:NA12878|1:NA12891|1	CNVR6752.1
16	75096634	16	75101526	DEL	4892	NA06986|2:NA07000|2:NA07037|1:NA07051|2:NA07346|1:NA07347|2:NA07357|2:NA11829|1:NA11830|2:NA11831|2:NA11881|2:NA11894|2:NA11918|2:NA11919|2:NA11920|1:NA11931|1:NA11992|2:NA11993|1:NA11994|2:NA11995|1:NA12003|1:NA12006|1:NA12043|2:NA12044|2:NA12045|1:NA12144|1:NA12154|1:NA12155|2:NA12156|1:NA12287|1:NA12489|2:NA12716|1:NA12749|2:NA12750|1:NA12751|2:NA12761|1:NA12763|2:NA12776|1:NA12813|2:NA12828|1…	CNVR6782.1
16	76929139	16	76942399	DEL	13260	NA06986|1:NA07000|1:NA07037|1:NA07051|1:NA07347|2:NA07357|1:NA11831|1:NA11881|1:NA11919|1:NA11920|2:NA11992|1:NA11994|1:NA11995|1:NA12003|1:NA12006|1:NA12043|1:NA12044|1:NA12144|1:NA12154|2:NA12156|1:NA12287|2:NA12489|1:NA12716|1:NA12749|1:NA12750|1:NA12751|1:NA12761|2:NA12763|2:NA12776|1:NA12828|1	CNVR6791.2
16	86385864	16	86388966	DEL	3102	NA12043|1:NA12287|1	CNVR6850.1
17	193767	17	197056	DEL	3289	NA06994|1:NA07000|2:NA07051|1:NA07346|1:NA07347|1:NA07357|2:NA11894|2:NA11918|1:NA11919|1:NA11993|1:NA11995|2:NA12006|1:NA12043|1:NA12044|1:NA12249|1:NA12489|2:NA12749|2:NA12750|1:NA12751|2:NA12761|1:NA12763|1:NA12813|1:NA12828|1:NA12878|1:NA12891|1	CNVR6908.1
17	5536431	17	5538222	DEL	1791	NA07357|1:NA12878|1:NA12891|2	CNVR6961.1
17	11352392	17	11353062	DEL	670	NA06986|1:NA07000|1:NA07051|1:NA07347|1:NA07357|2:NA11831|1:NA11918|1:NA11931|2:NA11993|1:NA12003|1:NA12006|1:NA12155|2:NA12156|1:NA12716|1:NA12749|1:NA12751|1:NA12761|1:NA12763|1:NA12828|1:NA12892|1	CNVR6990.1
17	15730280	17	15734511	DEL	4231	NA06986|1:NA07000|2:NA07037|1:NA07347|1:NA07357|1:NA11881|1:NA11894|1:NA11918|1:NA11919|2:NA11920|1:NA11931|1:NA11993|1:NA11994|1:NA11995|1:NA12003|1:NA12006|1:NA12044|1:NA12045|1:NA12489|1:NA12716|1:NA12761|1:NA12813|1:NA12828|1:NA12891|1	CNVR7004.1
17	23804514	17	23807620	DEL	3106	NA07000|2:NA07051|2:NA07346|2:NA07347|2:NA07357|2:NA11829|2:NA11830|1:NA11831|1:NA11881|1:NA11894|1:NA11918|1:NA11919|1:NA11920|1:NA11931|1:NA11992|1:NA11995|2:NA12003|1:NA12043|1:NA12045|2:NA12144|1:NA12154|1:NA12155|2:NA12156|1:NA12249|2:NA12287|1:NA12489|1:NA12716|1:NA12749|1:NA12750|1:NA12751|1:NA12761|2:NA12763|2:NA12776|1:NA12828|1:NA12878|1:NA12891|2:NA12892|1	CNVR7047.1
17	53042810	17	53044915	DEL	2105	NA06986|1:NA06994|1:NA07000|1:NA07037|1:NA07051|2:NA07346|2:NA07347|1:NA07357|2:NA11829|2:NA11830|1:NA11831|2:NA11881|2:NA11918|1:NA11919|2:NA11931|2:NA11993|2:NA11994|1:NA11995|2:NA12003|1:NA12006|1:NA12043|1:NA12044|1:NA12045|2:NA12144|2:NA12154|2:NA12156|1:NA12249|1:NA12287|1:NA12716|1:NA12749|2:NA12750|2:NA12751|1:NA12761|2:NA12776|2:NA12813|2:NA12828|2:NA12891|1:NA12892|1	CNVR7144.1
17	71873832	17	71876903	DEL	3071	NA06986|1:NA06994|1:NA11918|2:NA11919|1:NA11931|1:NA12154|1:NA12716|1:NA12750|1:NA12763|1	CNVR7201.1
18	5314645	18	5316244	DEL	1599	NA06986|1:NA07000|2:NA07051|1:NA07346|2:NA07347|1:NA07357|1:NA11829|2:NA11830|2:NA11831|2:NA11881|2:NA11894|1:NA11918|2:NA11919|1:NA11920|2:NA11931|1:NA11993|1:NA11994|2:NA11995|1:NA12003|2:NA12006|1:NA12043|2:NA12044|2:NA12045|2:NA12154|2:NA12155|1:NA12156|2:NA12249|2:NA12287|1:NA12489|1:NA12749|1:NA12750|1:NA12751|1:NA12761|1:NA12763|2:NA12776|1:NA12813|2:NA12828|1:NA12878|1:NA12891|2:NA12892|1	CNVR7241.1
18	22825618	18	22826339	DEL	721	NA06986|1:NA06994|2:NA07000|1:NA07037|1:NA07051|1:NA07347|1:NA07357|1:NA11829|2:NA11831|2:NA11881|1:NA11918|2:NA11920|1:NA11992|1:NA11993|1:NA11994|2:NA11995|1:NA12006|1:NA12043|2:NA12044|1:NA12045|2:NA12144|1:NA12155|2:NA12716|1:NA12750|2:NA12751|1:NA12761|1:NA12813|1:NA12828|1:NA12878|1:NA12891|1:NA12892|1	CNVR7283.1
18	28749691	18	28755259	DEL	5568	NA12878|1:NA12891|1	CNVR7293.1
18	36513891	18	36520748	DEL	6857	NA06986|1:NA06994|2:NA07000|1:NA07037|1:NA07346|1:NA07347|1:NA11829|1:NA11919|1:NA11920|1:NA11993|2:NA12006|1:NA12044|1:NA12154|1:NA12155|1:NA12287|1:NA12489|1:NA12750|1:NA12751|1:NA12761|2:NA12763|1:NA12776|1:NA12878|1:NA12891|1	CNVR7307.1
18	40230705	18	40236072	DEL	5367	NA07000|1:NA07346|1:NA11831|1:NA12751|1	CNVR7312.1
18	49390403	18	49391772	DEL	1369	NA06986|1:NA11994|2:NA12006|1:NA12044|1:NA12045|1:NA12751|1	CNVR7336.1
18	49459967	18	49464573	DEL	4606	NA11993|1:NA12043|1:NA12044|1:NA12776|1	CNVR7337.1
18	53097735	18	53099715	DEL	1980	NA06986|1:NA06994|1:NA07000|1:NA07037|2:NA07346|2:NA07347|2:NA07357|2:NA11830|2:NA11831|1:NA11881|1:NA11894|2:NA11918|2:NA11919|1:NA11920|2:NA11931|1:NA11992|2:NA11993|2:NA11994|2:NA11995|2:NA12003|2:NA12006|2:NA12043|2:NA12044|1:NA12045|1:NA12144|2:NA12154|1:NA12155|1:NA12156|1:NA12249|1:NA12287|1:NA12489|2:NA12716|2:NA12749|1:NA12750|2:NA12751|2:NA12761|1:NA12763|1:NA12776|1:NA12813|1:NA12828|2…	CNVR7344.1
18	61874818	18	61883348	DEL	8530	NA06986|1:NA06994|2:NA07037|1:NA07346|1:NA07347|1:NA11918|1:NA11920|1:NA11995|1:NA12043|1:NA12044|1:NA12144|1:NA12154|1:NA12155|1:NA12287|1:NA12750|1:NA12776|1:NA12828|1:NA12878|1:NA12892|1	CNVR7364.1
18	61917853	18	61920186	DEL	2333	NA07000|1:NA07357|1:NA11829|1:NA11830|1:NA11831|1:NA11881|1:NA11919|2:NA11920|1:NA11931|1:NA11992|2:NA11993|2:NA11994|1:NA12003|1:NA12043|1:NA12144|1:NA12156|1:NA12287|1:NA12489|1:NA12749|1:NA12750|1:NA12751|1:NA12878|1:NA12891|1	CNVR7365.1
18	73395986	18	73397148	DEL	1162	NA06986|1:NA06994|1:NA07000|1:NA07037|1:NA07051|1:NA07347|1:NA07357|1:NA11829|1:NA11830|2:NA11831|2:NA11881|1:NA11894|1:NA11919|1:NA11920|2:NA11931|1:NA11992|1:NA11994|1:NA11995|2:NA12003|1:NA12006|1:NA12043|2:NA12044|1:NA12045|1:NA12144|2:NA12154|2:NA12156|2:NA12287|2:NA12716|1:NA12749|1:NA12750|1:NA12761|1:NA12763|2:NA12813|1:NA12878|2:NA12891|2:NA12892|2	CNVR7401.1
18	75158734	18	75159972	DEL	1238	NA06994|1:NA07000|1:NA11831|1:NA11894|1:NA12144|2:NA12155|1:NA12249|2:NA12749|1:NA12751|1:NA12763|1:NA12878|1:NA12891|1	CNVR7428.1
19	14907392	19	14910477	DEL	3085	NA06986|1:NA07000|1:NA07037|1:NA07051|1:NA07346|2:NA07347|2:NA07357|1:NA11829|2:NA11830|1:NA11831|1:NA11881|2:NA11894|2:NA11918|1:NA11919|2:NA11920|2:NA11931|2:NA11992|1:NA11993|1:NA11994|1:NA11995|1:NA12003|1:NA12006|2:NA12043|1:NA12045|1:NA12144|2:NA12154|1:NA12249|1:NA12489|2:NA12750|1:NA12751|1:NA12761|1:NA12763|1:NA12776|2:NA12813|1:NA12828|1:NA12878|2:NA12891|1:NA12892|2	CNVR7551.1
19	51314576	19	51320153	DEL	5577	NA12003|1:NA12749|1:NA12763|1:NA12878|1:NA12891|1	CNVR7673.1
19	61558270	19	61561735	DEL	3465	NA11831|1:NA11992|1:NA11994|1:NA12044|1:NA12813|1	CNVR7740.1
2	18866355	2	18866872	DEL	517	NA06994|1:NA07347|1:NA11831|1:NA11918|1:NA11992|1:NA12006|1:NA12044|1:NA12154|1:NA12249|2:NA12489|1:NA12761|2	CNVR706.1
2	34549333	2	34590071	DEL	40738	NA06986|1:NA06994|1:NA07051|2:NA07346|1:NA07347|1:NA07357|1:NA11829|1:NA11830|1:NA11831|1:NA11881|1:NA11894|1:NA11918|1:NA11919|2:NA11992|1:NA11994|2:NA12003|1:NA12006|1:NA12045|1:NA12155|2:NA12156|1:NA12489|2:NA12716|2:NA12751|2:NA12813|2:NA12878|1:NA12891|2:NA12892|1	CNVR743.1
2	51780091	2	51781274	DEL	1183	NA06986|1:NA07346|1:NA11931|1:NA12043|1:NA12155|1:NA12249|1:NA12749|1:NA12763|1:NA12878|1:NA12891|1	CNVR793.1
2	52603195	2	52638774	DEL	35579	NA06986|1:NA07051|1:NA07346|1:NA07347|1:NA11829|1:NA11830|1:NA11831|1:NA11881|2:NA11894|1:NA11918|1:NA11992|1:NA11993|2:NA11995|1:NA12043|1:NA12156|1:NA12249|2:NA12716|1:NA12749|1:NA12750|1:NA12761|1:NA12763|1:NA12878|2:NA12891|2:NA12892|1	CNVR794.1
2	78930081	2	78934716	DEL	4635	NA07000|2:NA07037|1:NA07051|2:NA07357|1:NA11829|1:NA11830|1:NA11831|1:NA11894|1:NA11992|1:NA11993|2:NA12144|1:NA12155|1:NA12156|1:NA12489|1:NA12749|1:NA12751|1:NA12763|1:NA12776|1:NA12828|1:NA12878|2:NA12891|1:NA12892|2	CNVR847.1
2	99470145	2	99471464	DEL	1319	NA06994|1:NA07000|1:NA07051|2:NA07347|1:NA11831|2:NA11881|1:NA11919|1:NA11920|1:NA11931|1:NA11993|1:NA11994|1:NA11995|1:NA12003|2:NA12043|1:NA12044|2:NA12045|1:NA12144|1:NA12154|1:NA12749|1:NA12751|1:NA12761|1:NA12763|1:NA12776|1	CNVR892.1
2	108221850	2	108222713	DEL	863	NA06994|1:NA07000|1:NA07037|1:NA07051|1:NA07346|1:NA07347|1:NA07357|2:NA11829|1:NA11831|2:NA11881|1:NA11894|2:NA11918|1:NA11919|2:NA11920|1:NA11993|1:NA11994|1:NA11995|1:NA12003|2:NA12006|1:NA12043|1:NA12044|1:NA12144|1:NA12154|1:NA12249|2:NA12716|2:NA12749|1:NA12751|1:NA12761|2:NA12763|1:NA12813|1:NA12878|2:NA12891|1:NA12892|1	CNVR914.1
2	116378546	2	116379128	DEL	582	NA07051|1:NA07347|1:NA11881|1:NA12003|1:NA12043|1:NA12287|1:NA12776|1:NA12878|1:NA12891|1:NA12892|1	CNVR943.1
2	126159721	2	126168305	DEL	8584	NA06986|2:NA06994|1:NA07000|2:NA07037|2:NA07051|2:NA07346|1:NA07357|1:NA11829|2:NA11830|1:NA11831|2:NA11881|1:NA11894|1:NA11918|1:NA11919|2:NA11920|2:NA11931|2:NA11993|2:NA11994|1:NA11995|2:NA12003|1:NA12006|1:NA12043|2:NA12044|1:NA12045|1:NA12144|2:NA12155|1:NA12156|2:NA12249|1:NA12287|2:NA12489|2:NA12716|2:NA12749|2:NA12750|1:NA12761|2:NA12763|1:NA12776|1:NA12813|1:NA12828|2:NA12878|1:NA12891|1…	CNVR966.1
2	129354891	2	129362675	DEL	7784	NA06994|1:NA07000|1:NA07347|1:NA11829|1:NA11830|1:NA11894|1:NA12144|1:NA12287|2:NA12750|2:NA12751|1:NA12776|1:NA12813|1:NA12878|1:NA12891|1:NA12892|1	CNVR976.1
2	129958716	2	129967880	DEL	9164	NA06994|1:NA11992|1:NA12045|1:NA12878|1:NA12891|1	CNVR979.1
2	146579091	2	146593334	DEL	14243	NA06986|2:NA07051|1:NA07346|2:NA07357|1:NA11829|2:NA11881|1:NA11894|1:NA11918|2:NA11919|2:NA11920|2:NA11931|1:NA11992|1:NA11994|1:NA11995|1:NA12003|1:NA12043|1:NA12044|1:NA12045|2:NA12144|2:NA12154|2:NA12155|2:NA12156|1:NA12249|1:NA12287|1:NA12489|1:NA12716|1:NA12749|2:NA12750|1:NA12776|1:NA12813|1:NA12828|1:NA12878|2:NA12891|1:NA12892|1	CNVR1020.1
2	153504243	2	153507991	DEL	3748	NA06986|1:NA07051|1:NA07346|1:NA07357|1:NA11831|1:NA11881|1:NA11894|1:NA11920|1:NA11931|1:NA11992|1:NA11994|1:NA11995|1:NA12003|1:NA12043|1:NA12045|2:NA12144|1:NA12155|2:NA12156|1:NA12249|1:NA12287|2:NA12489|2:NA12749|2:NA12751|2:NA12776|1:NA12813|1:NA12828|2	CNVR1027.1
2	188827471	2	188829231	DEL	1760	NA11829|1:NA11831|1:NA11894|1:NA12003|1:NA12043|1:NA12156|1:NA12287|1:NA12813|1:NA12891|1:NA12892|1	CNVR1087.1
2	215437008	2	215439078	DEL	2070	NA06994|1:NA07037|2:NA07051|1:NA07346|2:NA07347|1:NA07357|1:NA11829|1:NA11830|1:NA11881|1:NA11894|1:NA11918|1:NA11919|1:NA11920|1:NA11931|1:NA11993|2:NA11994|1:NA12003|1:NA12006|2:NA12043|1:NA12044|1:NA12045|1:NA12154|1:NA12155|1:NA12156|1:NA12249|1:NA12489|1:NA12749|1:NA12750|1:NA12751|1:NA12763|1:NA12776|1:NA12878|1:NA12891|1:NA12892|1	CNVR1133.1
20	1337143	20	1338817	DEL	1674	NA06986|1:NA06994|2:NA07000|1:NA07037|1:NA07051|1:NA07347|1:NA07357|1:NA11830|1:NA11881|1:NA11918|1:NA11920|2:NA11931|1:NA11992|1:NA11993|1:NA11995|2:NA12006|1:NA12043|2:NA12045|2:NA12154|2:NA12156|1:NA12249|1:NA12287|2:NA12489|2:NA12716|1:NA12750|1:NA12751|1:NA12761|2:NA12763|2:NA12776|1:NA12813|1:NA12828|2:NA12878|1:NA12891|1:NA12892|1	CNVR7762.1
20	15249734	20	15251771	DEL	2037	NA06994|2:NA07000|1:NA07346|1:NA07347|1:NA07357|1:NA11829|1:NA11831|1:NA11881|1:NA11919|1:NA11920|1:NA11931|1:NA11992|1:NA11993|1:NA11994|1:NA11995|1:NA12044|1:NA12154|1:NA12156|1:NA12751|1:NA12776|1	CNVR7794.1
20	36488476	20	36489226	DEL	750	NA11894|1:NA11919|1:NA12154|1:NA12287|1:NA12878|1:NA12891|1	CNVR7842.1
20	61195144	20	61196043	DEL	899	NA06986|2:NA06994|1:NA07000|2:NA07037|1:NA07051|2:NA07346|1:NA07347|1:NA07357|1:NA11829|2:NA11830|2:NA11831|2:NA11881|2:NA11894|2:NA11918|2:NA11919|2:NA11920|2:NA11931|2:NA11992|2:NA11994|1:NA11995|2:NA12003|2:NA12006|1:NA12043|1:NA12045|1:NA12144|2:NA12154|2:NA12155|1:NA12156|2:NA12249|2:NA12287|2:NA12489|1:NA12716|2:NA12749|2:NA12750|2:NA12751|2:NA12761|1:NA12763|1:NA12776|2:NA12813|2:NA12828|1…	CNVR7927.1
21	15510251	21	15513325	DEL	3074	NA06986|1:NA06994|1:NA07000|1:NA07346|2:NA07347|1:NA11829|1:NA11830|1:NA11831|2:NA11881|2:NA11894|1:NA11918|1:NA11920|1:NA11931|1:NA11993|2:NA11995|2:NA12006|1:NA12043|1:NA12044|1:NA12045|1:NA12144|1:NA12154|2:NA12155|1:NA12156|1:NA12287|2:NA12716|1:NA12750|2:NA12751|1:NA12761|1:NA12763|1:NA12776|2:NA12828|1	CNVR7956.2
21	42223191	21	42226560	DEL	3369	NA07357|2:NA11995|1:NA12154|1:NA12749|1:NA12828|1:NA12878|1:NA12891|1	CNVR8021.1
21	43794796	21	43797732	DEL	2936	NA06986|2:NA07000|1:NA07037|1:NA07051|1:NA07347|2:NA07357|1:NA11829|1:NA11918|2:NA11919|1:NA11920|1:NA11931|1:NA11992|2:NA11994|2:NA11995|2:NA12006|1:NA12043|1:NA12044|1:NA12045|1:NA12144|1:NA12154|1:NA12155|1:NA12156|1:NA12249|1:NA12287|2:NA12716|2:NA12750|1:NA12761|1:NA12763|2:NA12776|1:NA12828|2:NA12878|1:NA12891|1:NA12892|1	CNVR8030.1
21	44443627	21	44445149	DEL	1522	NA06994|1:NA07037|1:NA07346|1:NA07357|1:NA11931|1:NA12045|1:NA12144|1:NA12154|1:NA12156|1:NA12489|1:NA12716|2:NA12751|1:NA12776|1:NA12828|1:NA12891|1	CNVR8037.1
22	37624054	22	37628634	DEL	4580	NA06994|2:NA07000|2:NA07037|1:NA07051|2:NA07346|1:NA07347|1:NA07357|1:NA11830|1:NA11831|1:NA11881|1:NA11918|1:NA11931|1:NA12003|1:NA12006|2:NA12043|1:NA12044|1:NA12045|1:NA12144|1:NA12155|2:NA12249|1:NA12287|1:NA12489|1:NA12716|1:NA12749|1:NA12751|1:NA12761|1:NA12763|1:NA12776|1:NA12813|2:NA12828|1:NA12891|1:NA12892|1	CNVR8163.1
3	8300639	3	8301812	DEL	1173	NA07037|1:NA07051|1:NA11830|1:NA11881|1:NA11918|2:NA11920|1:NA11993|1:NA11995|1:NA12043|1:NA12045|1:NA12144|1:NA12154|1:NA12155|1:NA12489|1:NA12751|1:NA12761|1:NA12828|1:NA12878|1:NA12891|1:NA12892|1	CNVR1278.1
3	13116442	3	13117591	DEL	1149	NA11894|2:NA11994|1:NA12003|1:NA12043|1:NA12144|2:NA12154|1:NA12761|1:NA12776|1:NA12828|1:NA12878|2:NA12891|1:NA12892|1	CNVR1295.1
3	15820177	3	15821743	DEL	1566	NA07037|1:NA11830|1:NA11992|1:NA11993|1:NA12044|1:NA12751|1:NA12891|1	CNVR1306.1
3	25005891	3	25007254	DEL	1363	NA06994|1:NA07037|2:NA07051|1:NA07347|1:NA07357|2:NA11829|1:NA11830|2:NA11881|1:NA11918|1:NA11920|1:NA11995|1:NA12006|2:NA12045|2:NA12144|1:NA12155|2:NA12249|2:NA12489|2:NA12716|1:NA12750|2:NA12776|1:NA12828|1:NA12878|1:NA12892|2	CNVR1326.1
3	26425974	3	26427303	DEL	1329	NA06986|1:NA06994|1:NA07000|1:NA07037|2:NA07051|1:NA07347|1:NA07357|2:NA11829|2:NA11831|2:NA11881|1:NA11894|1:NA11918|1:NA11920|1:NA11931|1:NA11993|1:NA11994|1:NA11995|1:NA12003|2:NA12006|2:NA12043|1:NA12045|2:NA12144|1:NA12154|1:NA12155|2:NA12287|2:NA12489|2:NA12716|2:NA12750|1:NA12751|1:NA12761|1:NA12763|1:NA12776|2:NA12813|1:NA12828|1:NA12878|1:NA12891|1:NA12892|2	CNVR1329.1
3	32077056	3	32082889	DEL	5833	NA06986|2:NA06994|1:NA07037|1:NA07051|2:NA07346|2:NA07347|2:NA11829|2:NA11831|1:NA11881|1:NA11918|1:NA11920|2:NA11931|2:NA11993|1:NA11994|1:NA11995|1:NA12003|2:NA12006|2:NA12043|2:NA12044|2:NA12045|2:NA12144|1:NA12154|2:NA12155|1:NA12249|2:NA12287|1:NA12489|2:NA12716|2:NA12749|2:NA12761|1:NA12763|2:NA12776|2:NA12813|2:NA12828|2:NA12878|1:NA12891|1:NA12892|2	CNVR1341.1
3	47465673	3	47468447	DEL	2774	NA06986|2:NA06994|2:NA07000|1:NA07037|1:NA07051|1:NA07347|1:NA07357|1:NA11829|1:NA11830|1:NA11831|1:NA11894|1:NA11918|1:NA11919|1:NA11931|1:NA11992|1:NA11993|2:NA11994|1:NA11995|2:NA12006|1:NA12043|1:NA12045|1:NA12144|2:NA12155|1:NA12156|1:NA12489|2:NA12751|2:NA12761|1:NA12763|1:NA12813|1:NA12828|1:NA12878|1:NA12892|1	CNVR1375.1
3	84187632	3	84190074	DEL	2442	NA07051|1:NA11881|1:NA11919|1:NA11993|1:NA11995|2:NA12003|1:NA12006|1:NA12043|1:NA12144|1:NA12155|1:NA12287|1:NA12489|1:NA12716|1:NA12749|2:NA12761|1:NA12763|2:NA12828|1	CNVR1447.1
3	101111472	3	101112321	DEL	849	NA06986|1:NA07000|1:NA07051|1:NA07347|1:NA11829|2:NA11831|1:NA11894|1:NA11919|1:NA11920|1:NA11931|1:NA11992|1:NA11995|1:NA12006|1:NA12045|1:NA12144|1:NA12155|2:NA12249|2:NA12716|1:NA12751|1:NA12813|1:NA12828|1:NA12878|1:NA12892|1	CNVR1469.1
3	105760890	3	105761737	DEL	847	NA06986|1:NA07037|2:NA07051|1:NA07357|1:NA11829|2:NA11831|1:NA11881|1:NA11919|1:NA11931|1:NA11993|1:NA11994|1:NA11995|1:NA12006|1:NA12043|1:NA12044|2:NA12045|1:NA12154|1:NA12155|1:NA12749|1:NA12751|1:NA12761|1:NA12763|2:NA12776|1:NA12828|1:NA12878|1:NA12892|2	CNVR1480.1
3	105760890	3	105761737	DEL	847	NA06986|1:NA07037|2:NA07051|1:NA07357|1:NA11829|2:NA11831|1:NA11881|1:NA11919|1:NA11931|1:NA11993|1:NA11994|1:NA11995|1:NA12006|1:NA12043|1:NA12044|2:NA12045|1:NA12154|1:NA12155|1:NA12749|1:NA12751|1:NA12761|1:NA12763|2:NA12776|1:NA12828|1:NA12878|1:NA12892|2	CNVR1480.1
3	108520647	3	108523025	DEL	2378	NA06994|2:NA07000|1:NA07037|1:NA07051|1:NA07347|1:NA07357|1:NA11830|1:NA11894|1:NA11920|2:NA11931|1:NA11993|1:NA11995|1:NA12043|1:NA12045|1:NA12144|1:NA12249|2:NA12287|2:NA12749|2:NA12750|1:NA12751|1:NA12761|1:NA12763|1:NA12776|1:NA12828|1:NA12892|1	CNVR1485.1
3	131614714	3	131615594	DEL	880	NA12003|1:NA12043|1:NA12751|1:NA12878|1:NA12891|1:NA12892|1	CNVR1540.1
3	142027098	3	142029737	DEL	2639	NA06994|1:NA07000|1:NA07037|2:NA07051|1:NA07347|2:NA11829|1:NA11830|1:NA11831|1:NA11894|2:NA11919|1:NA11920|1:NA11992|1:NA11993|1:NA11995|1:NA12006|1:NA12045|1:NA12144|1:NA12156|1:NA12249|1:NA12763|1:NA12828|1	CNVR1562.1
3	150751166	3	150752841	DEL	1675	NA06994|1:NA07347|1:NA12006|1:NA12045|1:NA12287|1:NA12716|1	CNVR1583.1
3	157574864	3	157576385	DEL	1521	NA06986|1:NA07000|1:NA07051|1:NA07347|1:NA11993|1:NA11995|1:NA12043|1:NA12144|1:NA12489|2:NA12750|1:NA12763|1:NA12813|1:NA12828|1:NA12878|1:NA12891|1	CNVR1591.1
3	163994828	3	164109029	DEL	114201	NA06994|1:NA07000|1:NA07037|1:NA07347|1:NA07357|2:NA11881|1:NA11918|1:NA11931|1:NA11994|1:NA12003|2:NA12006|1:NA12154|1:NA12249|1:NA12716|1:NA12749|1:NA12750|2:NA12751|1:NA12761|1:NA12813|1:NA12878|1:NA12891|2:NA12892|1	CNVR1608.1
3	180032827	3	180033568	DEL	741	NA06986|2:NA06994|1:NA07000|1:NA07037|1:NA07051|2:NA07346|2:NA07347|2:NA11829|2:NA11831|1:NA11881|1:NA11894|2:NA11918|1:NA11919|2:NA11920|1:NA11992|1:NA11993|2:NA11995|2:NA12003|2:NA12006|1:NA12043|1:NA12044|1:NA12144|2:NA12156|1:NA12249|2:NA12287|2:NA12489|2:NA12716|2:NA12749|1:NA12751|1:NA12761|2:NA12763|2:NA12813|2:NA12828|1:NA12878|1:NA12891|2:NA12892|1	CNVR1648.2
3	191220042	3	191223222	DEL	3180	NA07051|2:NA07347|1:NA07357|1:NA11829|1:NA11831|1:NA11918|1:NA11920|1:NA11931|2:NA11992|1:NA11995|1:NA12003|1:NA12006|2:NA12044|2:NA12045|1:NA12144|2:NA12154|1:NA12156|1:NA12249|1:NA12287|1:NA12716|1:NA12776|2:NA12813|1:NA12828|1:NA12878|1:NA12891|2:NA12892|1	CNVR1669.1
3	192547379	3	192554361	DEL	6982	NA06994|1:NA07051|1:NA07346|1:NA07347|1:NA07357|1:NA11829|1:NA11831|2:NA11881|1:NA11894|1:NA11919|1:NA11931|1:NA11993|1:NA11994|1:NA12003|1:NA12043|1:NA12044|1:NA12144|1:NA12154|1:NA12156|1:NA12249|1:NA12287|1:NA12489|1:NA12716|1:NA12750|1:NA12751|1:NA12776|1:NA12813|1:NA12828|1	CNVR1675.1
3	194358026	3	194368102	DEL	10076	NA06986|2:NA06994|2:NA07000|2:NA07037|2:NA07051|1:NA07346|1:NA07347|1:NA07357|2:NA11830|2:NA11831|2:NA11894|2:NA11918|1:NA11919|2:NA11931|1:NA11993|2:NA11994|1:NA11995|1:NA12003|1:NA12006|1:NA12043|2:NA12044|1:NA12045|1:NA12144|2:NA12154|1:NA12155|2:NA12156|1:NA12249|1:NA12287|2:NA12489|1:NA12716|2:NA12750|2:NA12751|1:NA12761|2:NA12763|2:NA12776|1:NA12813|1:NA12828|1:NA12878|1:NA12891|2:NA12892|1	CNVR1685.1
3	198418970	3	198423652	DEL	4682	NA07037|1:NA11829|1:NA11881|1:NA11919|1:NA11993|1:NA11994|1:NA12003|1:NA12043|1:NA12144|1:NA12154|1:NA12287|1:NA12489|1:NA12750|1:NA12761|1:NA12763|1:NA12776|1:NA12813|1:NA12828|1:NA12878|1:NA12891|1	CNVR1716.1
4	6733297	4	6736765	DEL	3468	NA11881|2:NA12716|1:NA12749|1:NA12750|1	CNVR1791.1
4	45897554	4	45899785	DEL	2231	NA06994|2:NA07000|1:NA07037|1:NA07346|1:NA07347|2:NA07357|1:NA11829|1:NA11830|2:NA11881|1:NA11918|1:NA11919|1:NA11920|2:NA11931|1:NA11994|1:NA11995|1:NA12003|2:NA12044|2:NA12154|1:NA12155|1:NA12156|2:NA12287|1:NA12489|2:NA12716|2:NA12749|2:NA12750|1:NA12751|1:NA12761|2:NA12763|2:NA12776|1:NA12813|1:NA12828|2:NA12891|1	CNVR1904.1
4	61621786	4	61624840	DEL	3054	NA06986|1:NA06994|2:NA07000|2:NA07051|1:NA07346|1:NA07347|1:NA07357|2:NA11829|1:NA11830|1:NA11831|1:NA11881|1:NA11894|2:NA11918|1:NA11992|2:NA11993|1:NA11995|1:NA12003|1:NA12006|1:NA12043|1:NA12045|1:NA12144|1:NA12154|1:NA12156|2:NA12249|2:NA12287|1:NA12489|2:NA12716|1:NA12750|1:NA12751|2:NA12761|1:NA12763|2:NA12776|1:NA12813|2:NA12828|1:NA12878|1:NA12891|1:NA12892|1	CNVR1937.1
4	87195401	4	87198978	DEL	3577	NA07357|1:NA11830|1:NA11881|1:NA12154|1:NA12750|1:NA12763|1:NA12776|1:NA12828|1:NA12878|1:NA12891|1	CNVR1991.1
4	92150579	4	92154859	DEL	4280	NA06986|1:NA07000|1:NA07037|2:NA07346|2:NA07347|1:NA07357|1:NA11829|1:NA11830|1:NA11881|1:NA11894|1:NA11918|1:NA11919|1:NA11992|2:NA11995|1:NA12006|1:NA12044|1:NA12154|2:NA12155|1:NA12156|2:NA12249|1:NA12489|2:NA12716|1:NA12761|1:NA12776|1:NA12828|1:NA12878|1:NA12891|1	CNVR2000.1
4	98573314	4	98578237	DEL	4923	NA07051|1:NA11830|1:NA11831|1:NA11881|1:NA11919|1:NA11920|2:NA12003|1:NA12006|2:NA12144|2:NA12154|1:NA12287|1:NA12489|1:NA12749|1:NA12750|1:NA12751|1:NA12763|1:NA12776|1:NA12828|2	CNVR2013.1
4	107276027	4	107282811	DEL	6784	NA06986|1:NA07347|1:NA07357|1:NA11881|1:NA11894|1:NA11918|1:NA11920|1:NA11992|1:NA12003|1:NA12044|1:NA12045|2:NA12154|1:NA12156|1:NA12249|1:NA12489|1:NA12716|1:NA12750|1:NA12751|1:NA12763|1:NA12776|1:NA12813|1	CNVR2030.1
4	107823749	4	107828706	DEL	4957	NA06986|1:NA07357|1:NA11830|1:NA11881|1:NA11894|1:NA11920|1:NA12043|1:NA12044|1:NA12749|1:NA12776|1:NA12813|1:NA12878|1:NA12891|1	CNVR2032.1
4	117587246	4	117587942	DEL	696	NA07000|1:NA07037|1:NA07051|1:NA11830|1:NA11920|1:NA11994|1:NA11995|1:NA12249|1:NA12776|1:NA12878|1:NA12892|1	CNVR2055.1
4	135652452	4	135655151	DEL	2699	NA06986|2:NA06994|2:NA07000|1:NA07037|1:NA07051|1:NA07346|1:NA07347|2:NA07357|2:NA11829|1:NA11830|2:NA11831|2:NA11881|2:NA11918|1:NA11920|1:NA11931|2:NA12003|2:NA12006|2:NA12043|2:NA12044|1:NA12045|1:NA12144|2:NA12154|1:NA12156|1:NA12249|1:NA12287|2:NA12489|2:NA12716|1:NA12749|1:NA12751|1:NA12761|1:NA12763|1:NA12776|1:NA12813|1:NA12828|2:NA12891|1	CNVR2080.1
4	162098484	4	162104398	DEL	5914	NA06994|1:NA11829|1:NA12045|1:NA12144|1:NA12156|1:NA12750|1:NA12878|1:NA12892|1	CNVR2137.1
4	163613455	4	163615872	DEL	2417	NA07051|1:NA11829|1:NA11920|1:NA11931|1:NA11992|1:NA11993|1:NA11994|1:NA12003|1:NA12006|2:NA12044|1:NA12045|1:NA12155|1:NA12249|1:NA12287|1:NA12489|1:NA12716|2:NA12776|1:NA12878|2:NA12891|1:NA12892|1	CNVR2141.1
4	167223766	4	167224369	DEL	603	NA07037|1:NA07051|2:NA07347|2:NA07357|1:NA11829|2:NA11830|1:NA11881|1:NA11894|1:NA11918|1:NA11919|1:NA11920|1:NA11931|1:NA11992|1:NA11993|1:NA11994|2:NA12006|1:NA12043|2:NA12144|2:NA12155|1:NA12489|1:NA12716|2:NA12749|1:NA12750|1:NA12751|1:NA12776|1:NA12828|1:NA12878|1:NA12892|2	CNVR2152.1
4	169045106	4	169229628	DEL	184522	NA12043|1	CNVR2161.1
4	172610983	4	172616000	DEL	5017	NA06986|2:NA06994|2:NA07000|1:NA07037|1:NA07051|2:NA07346|2:NA07347|2:NA07357|2:NA11829|2:NA11830|2:NA11881|2:NA11894|1:NA11918|1:NA11919|2:NA11920|2:NA11992|2:NA11993|1:NA11994|2:NA11995|1:NA12003|2:NA12006|2:NA12043|2:NA12044|1:NA12045|2:NA12144|2:NA12154|2:NA12155|2:NA12156|1:NA12249|2:NA12287|2:NA12489|2:NA12716|1:NA12749|1:NA12750|1:NA12751|2:NA12761|1:NA12763|2:NA12776|1:NA12813|1:NA12828|2	CNVR2168.1
4	173225214	4	173229506	DEL	4292	NA06994|1:NA07037|1:NA07051|1:NA07346|1:NA07347|1:NA07357|1:NA11829|1:NA11830|1:NA11881|1:NA11894|1:NA11918|1:NA11920|1:NA11931|2:NA11992|1:NA11994|1:NA11995|1:NA12006|1:NA12043|1:NA12044|1:NA12045|2:NA12144|1:NA12154|1:NA12155|2:NA12249|2:NA12287|1:NA12716|1:NA12749|2:NA12750|1:NA12751|1:NA12761|1:NA12763|1:NA12776|1:NA12828|2:NA12878|1:NA12892|2	CNVR2171.1
4	173661607	4	173670095	DEL	8488	NA06986|2:NA06994|2:NA07000|1:NA07037|2:NA07051|2:NA07346|2:NA07347|2:NA07357|1:NA11830|1:NA11831|1:NA11881|2:NA11894|1:NA11918|2:NA11919|1:NA11920|1:NA11931|2:NA11992|1:NA11993|2:NA11994|1:NA11995|1:NA12003|2:NA12006|2:NA12043|2:NA12044|2:NA12045|2:NA12144|2:NA12154|2:NA12155|1:NA12156|2:NA12249|2:NA12287|1:NA12489|2:NA12716|2:NA12749|2:NA12750|1:NA12751|1:NA12761|1:NA12763|1:NA12776|2:NA12813|2…	CNVR2172.1
4	175861744	4	175863548	DEL	1804	NA06986|1:NA06994|1:NA07000|1:NA07037|1:NA07051|1:NA07357|2:NA11830|1:NA11831|1:NA11918|1:NA11992|1:NA11994|1:NA11995|1:NA12003|2:NA12044|1:NA12045|1:NA12144|1:NA12155|1:NA12156|1:NA12891|1	CNVR2174.1
4	182293555	4	182294125	DEL	570	NA07000|1:NA07037|1:NA07347|1:NA11830|1:NA11831|1:NA11881|2:NA11894|1:NA11918|1:NA11920|1:NA11931|1:NA11992|1:NA11993|1:NA11994|2:NA11995|1:NA12003|1:NA12006|1:NA12043|1:NA12044|1:NA12045|1:NA12144|1:NA12154|1:NA12155|1:NA12249|1:NA12287|1:NA12716|1:NA12750|2:NA12751|2:NA12761|2:NA12763|2:NA12776|2:NA12813|2:NA12828|2:NA12878|2:NA12891|2:NA12892|2	CNVR2196.1
5	16177808	5	16178491	DEL	683	NA11931|1:NA12878|1:NA12891|1	CNVR2371.1
5	19411028	5	19412156	DEL	1128	NA06994|2:NA07000|1:NA07037|1:NA07051|1:NA07347|1:NA07357|1:NA11829|2:NA11830|2:NA11894|2:NA11918|1:NA11920|2:NA11931|2:NA11992|1:NA11993|2:NA11994|1:NA12003|1:NA12006|1:NA12043|1:NA12045|2:NA12155|1:NA12249|1:NA12287|2:NA12716|2:NA12751|2:NA12828|1:NA12878|1:NA12892|1	CNVR2388.1
5	21485956	5	21488250	DEL	2294	NA06986|2:NA06994|2:NA07000|1:NA07037|1:NA07051|1:NA07346|2:NA07347|1:NA07357|1:NA11881|2:NA11919|2:NA11993|1:NA11994|1:NA11995|1:NA12006|1:NA12043|1:NA12045|1:NA12156|2:NA12249|1:NA12287|1:NA12716|1:NA12749|1:NA12761|1:NA12763|2:NA12776|1:NA12813|1:NA12828|1:NA12878|2:NA12891|2:NA12892|2	CNVR2395.1
5	26832458	5	26837656	DEL	5198	NA07051|1:NA07346|1:NA07347|1:NA11829|1:NA11830|2:NA11831|2:NA11894|1:NA11920|1:NA11931|1:NA11992|1:NA11994|1:NA12006|1:NA12043|1:NA12045|1:NA12144|1:NA12156|2:NA12249|1:NA12287|1:NA12716|1:NA12749|2:NA12761|1:NA12763|1:NA12776|2:NA12878|1:NA12891|1	CNVR2407.1
5	63734102	5	63737115	DEL	3013	NA06986|1:NA06994|1:NA07000|1:NA07347|1:NA11830|1:NA11881|1:NA12006|2:NA12044|1:NA12155|1:NA12776|2:NA12813|1:NA12878|1:NA12892|1	CNVR2483.1
5	86281760	5	86282899	DEL	1139	NA11830|2:NA11831|1:NA11894|1:NA11920|1:NA12044|1:NA12045|1:NA12749|1:NA12761|1:NA12776|1:NA12828|1:NA12878|1:NA12891|1:NA12892|1	CNVR2522.1
5	106352650	5	106354342	DEL	1692	NA06986|1:NA06994|2:NA07000|1:NA07037|1:NA07051|1:NA07346|2:NA07347|2:NA07357|1:NA11830|1:NA11831|2:NA11881|2:NA11894|1:NA11918|1:NA11919|1:NA11920|1:NA11931|1:NA11992|2:NA11993|1:NA11994|2:NA11995|2:NA12006|1:NA12144|1:NA12154|1:NA12287|1:NA12749|1:NA12751|2:NA12761|1:NA12763|1:NA12776|1:NA12813|2:NA12828|1:NA12892|1	CNVR2554.1
5	119408045	5	119410579	DEL	2534	NA06986|2:NA06994|1:NA07000|1:NA07037|1:NA07346|2:NA07347|1:NA07357|1:NA11829|2:NA11830|1:NA11831|1:NA11881|1:NA11894|1:NA11918|2:NA11920|2:NA11931|1:NA11992|2:NA11993|2:NA11994|2:NA11995|2:NA12003|1:NA12006|1:NA12044|1:NA12045|1:NA12154|1:NA12156|1:NA12249|1:NA12287|1:NA12489|2:NA12716|1:NA12749|2:NA12750|2:NA12751|1:NA12776|1:NA12828|1:NA12878|2:NA12891|2:NA12892|2	CNVR2587.1
5	127435338	5	127438815	DEL	3477	NA06986|1:NA06994|1:NA07000|1:NA07037|2:NA11829|1:NA11830|1:NA11992|1:NA11994|1:NA12006|1:NA12044|1:NA12144|1:NA12154|1:NA12287|1:NA12716|1:NA12750|1:NA12763|2:NA12891|1	CNVR2600.1
5	133162590	5	133164387	DEL	1797	NA06986|2:NA06994|1:NA07037|1:NA07346|2:NA07347|1:NA11829|1:NA11830|1:NA11831|1:NA11881|1:NA11894|1:NA11918|1:NA11919|1:NA11992|1:NA12003|1:NA12006|1:NA12043|1:NA12044|1:NA12045|1:NA12156|1:NA12249|2:NA12750|1:NA12751|1:NA12763|1:NA12813|1:NA12828|1	CNVR2610.1
5	140202321	5	140219115	DEL	16794	NA07037|1:NA11894|1:NA11919|2:NA12287|2:NA12489|1:NA12716|1:NA12749|1:NA12776|1	CNVR2622.1
5	150157856	5	150161793	DEL	3937	NA06986|1:NA07347|1:NA11995|1:NA12287|1	CNVR2646.1
5	150183353	5	150203456	DEL	20103	NA06986|1:NA07347|1:NA11995|1:NA12287|1	CNVR2647.1
5	155244367	5	155245159	DEL	792	NA06994|1:NA07000|1:NA07037|1:NA07051|1:NA07346|1:NA11894|2:NA11919|1:NA11992|1:NA11994|1:NA11995|1:NA12045|1:NA12155|1:NA12489|1:NA12750|1:NA12761|1:NA12776|1:NA12813|1:NA12828|1:NA12878|1:NA12891|1	CNVR2658.1
5	162794351	5	162795869	DEL	1518	NA11830|1:NA11920|1:NA12043|1:NA12045|1:NA12144|1:NA12287|2:NA12749|1:NA12763|1:NA12813|1:NA12891|1	CNVR2669.1
5	166335344	5	166336212	DEL	868	NA07051|2:NA07346|1:NA07347|1:NA11831|1:NA11918|2:NA11993|1:NA11994|1:NA11995|1:NA12044|1:NA12045|1:NA12154|1:NA12155|1:NA12749|1:NA12750|1:NA12763|1:NA12776|1:NA12878|1:NA12891|1:NA12892|1	CNVR2676.1
5	180501840	5	180502585	DEL	745	NA07357|1:NA11829|1:NA11831|1:NA11919|1:NA11920|1:NA12003|1:NA12043|1:NA12156|1:NA12287|1:NA12489|1:NA12716|1:NA12763|1:NA12813|1:NA12828|1	CNVR2723.1
6	16992947	6	16994075	DEL	1128	NA07000|2:NA07037|1:NA07346|1:NA11830|1:NA11919|1:NA11920|1:NA11992|1:NA12249|1:NA12287|1:NA12761|1:NA12776|1	CNVR2789.1
6	23851238	6	23853924	DEL	2686	NA07000|1:NA07346|1:NA11829|1:NA11830|1:NA11831|1:NA11918|1:NA11931|1:NA11992|1:NA12043|1:NA12044|1:NA12155|1:NA12750|2:NA12751|1:NA12761|1:NA12776|1:NA12828|1:NA12878|2:NA12891|1:NA12892|2	CNVR2811.1
6	35734365	6	35737724	DEL	3359	NA06986|2:NA06994|1:NA07000|2:NA07037|1:NA07051|2:NA07346|1:NA07357|1:NA11829|1:NA11830|1:NA11831|1:NA11881|2:NA11894|1:NA11918|1:NA11919|1:NA11920|1:NA11931|1:NA11992|1:NA11993|1:NA11994|2:NA11995|1:NA12003|2:NA12006|2:NA12043|1:NA12044|1:NA12045|2:NA12144|2:NA12154|2:NA12155|2:NA12156|2:NA12249|2:NA12287|2:NA12489|1:NA12716|2:NA12749|1:NA12751|2:NA12761|2:NA12763|2:NA12776|1:NA12813|2:NA12828|1…	CNVR2859.1
6	51307435	6	51308085	DEL	650	NA07037|1:NA07346|1:NA11829|1:NA11881|1:NA11894|1:NA11919|2:NA11931|1:NA11993|1:NA12003|1:NA12006|1:NA12044|1:NA12154|1:NA12287|1:NA12749|1:NA12828|1	CNVR2899.1
6	51844070	6	51844767	DEL	697	NA06986|1:NA06994|1:NA07000|1:NA07051|2:NA07346|1:NA07347|2:NA07357|2:NA11831|1:NA11881|2:NA11894|2:NA11918|1:NA11920|1:NA11992|2:NA11993|1:NA11994|2:NA12003|1:NA12006|1:NA12044|1:NA12045|2:NA12144|1:NA12155|1:NA12156|1:NA12489|1:NA12716|1:NA12749|2:NA12750|2:NA12751|1:NA12761|1:NA12776|1:NA12813|1:NA12828|2:NA12878|1:NA12891|1:NA12892|1	CNVR2901.1
6	55933916	6	55954671	DEL	20755	NA12878|1:NA12891|1	CNVR2912.1
6	67097521	6	67099910	DEL	2389	NA11920|2:NA11931|1:NA11992|1:NA11993|1:NA12003|1:NA12043|1:NA12045|1:NA12155|1:NA12156|1:NA12287|1:NA12750|1:NA12751|1:NA12761|1:NA12776|1:NA12813|1:NA12878|2:NA12891|1	CNVR2946.2
6	69195308	6	69196113	DEL	805	NA06994|1:NA07037|1:NA07346|1:NA11830|1:NA11920|1:NA11995|1:NA12003|1:NA12750|1:NA12828|1	CNVR2951.1
6	89978472	6	89978896	DEL	424	NA06986|1:NA07000|1:NA07037|1:NA07051|1:NA07346|1:NA07347|1:NA07357|2:NA11829|2:NA11830|1:NA11881|1:NA11894|1:NA11918|1:NA11919|1:NA11920|1:NA11931|1:NA11993|1:NA11995|2:NA12003|1:NA12006|1:NA12043|1:NA12044|1:NA12045|1:NA12155|1:NA12156|2:NA12249|1:NA12287|2:NA12749|1:NA12750|1:NA12751|1:NA12761|2:NA12763|2:NA12776|1:NA12813|1:NA12828|1	CNVR2996.1
6	95250045	6	95251059	DEL	1014	NA06986|1:NA06994|2:NA07000|2:NA07051|2:NA07346|2:NA07347|2:NA07357|1:NA11829|1:NA11830|2:NA11831|1:NA11894|2:NA11918|2:NA11920|2:NA11931|1:NA11992|2:NA11993|2:NA11994|1:NA12003|2:NA12006|1:NA12044|1:NA12045|2:NA12144|2:NA12155|1:NA12156|1:NA12287|1:NA12489|1:NA12716|1:NA12749|2:NA12750|2:NA12751|1:NA12761|2:NA12763|1:NA12776|2:NA12813|1:NA12828|2:NA12891|1:NA12892|1	CNVR3004.1
6	100141223	6	100142043	DEL	820	NA06986|1:NA06994|2:NA07000|1:NA07037|2:NA07051|2:NA07346|2:NA07347|2:NA07357|2:NA11829|1:NA11830|1:NA11831|1:NA11881|1:NA11894|2:NA11918|1:NA11919|2:NA11920|1:NA11931|2:NA11992|2:NA11993|2:NA11994|2:NA11995|2:NA12003|2:NA12006|1:NA12043|2:NA12044|2:NA12045|2:NA12144|2:NA12154|2:NA12155|2:NA12156|2:NA12249|1:NA12287|2:NA12489|2:NA12716|2:NA12749|1:NA12750|1:NA12751|2:NA12761|1:NA12763|2:NA12776|2…	CNVR3009.1
6	103844156	6	103869582	DEL	25426	NA06986|1:NA06994|2:NA07000|1:NA07346|1:NA07347|1:NA07357|1:NA11830|1:NA11881|1:NA11894|1:NA11918|2:NA11919|1:NA11920|1:NA11931|2:NA11992|1:NA11993|1:NA11995|1:NA12003|1:NA12006|2:NA12043|1:NA12044|2:NA12045|1:NA12155|2:NA12156|1:NA12249|2:NA12716|1:NA12749|1:NA12750|1:NA12751|1:NA12878|1:NA12891|1:NA12892|1	CNVR3020.1
6	134310673	6	134311422	DEL	749	NA06986|1:NA07000|2:NA07051|1:NA07346|1:NA07347|1:NA07357|2:NA11829|1:NA11830|2:NA11831|1:NA11881|2:NA11918|1:NA11919|2:NA11920|1:NA11931|2:NA11993|1:NA12003|2:NA12006|1:NA12043|2:NA12044|1:NA12045|2:NA12144|2:NA12154|1:NA12156|1:NA12287|2:NA12489|1:NA12716|1:NA12749|1:NA12750|2:NA12751|2:NA12761|1:NA12763|1:NA12813|2:NA12828|1:NA12878|1:NA12891|1:NA12892|1	CNVR3074.1
6	141590317	6	141591727	DEL	1410	NA06986|2:NA07000|2:NA07037|2:NA07346|2:NA07347|1:NA07357|1:NA11829|2:NA11830|1:NA11831|1:NA11881|2:NA11894|1:NA11920|1:NA11931|2:NA11992|1:NA11994|1:NA11995|2:NA12006|1:NA12043|1:NA12044|1:NA12045|1:NA12154|1:NA12155|2:NA12156|1:NA12249|1:NA12716|1:NA12749|1:NA12750|1:NA12761|1:NA12828|1:NA12878|2:NA12891|1:NA12892|1	CNVR3083.1
6	154000064	6	154003221	DEL	3157	NA06986|1:NA07051|1:NA07357|1:NA11830|1:NA11831|1:NA11993|1:NA11994|1:NA11995|1:NA12006|1:NA12043|1:NA12144|1:NA12155|1:NA12489|1:NA12751|1:NA12813|1	CNVR3112.1
6	164463437	6	164467181	DEL	3744	NA06994|1:NA07000|1:NA11881|1:NA11894|1:NA12489|1:NA12716|1:NA12763|1	CNVR3150.1
7	13244637	7	13247240	DEL	2603	NA12891|1	CNVR3295.1
7	16138298	7	16140597	DEL	2299	NA06994|2:NA07000|2:NA07037|1:NA07051|2:NA07346|1:NA07347|1:NA11829|1:NA11831|1:NA11881|2:NA11919|1:NA11920|2:NA11931|2:NA11993|2:NA11994|2:NA11995|1:NA12006|1:NA12044|1:NA12144|1:NA12154|1:NA12155|2:NA12156|1:NA12249|1:NA12287|1:NA12489|1:NA12716|1:NA12749|1:NA12750|1:NA12751|1:NA12761|2:NA12763|1:NA12776|1:NA12828|1:NA12891|1	CNVR3304.1
7	20715311	7	20720104	DEL	4793	NA12750|1:NA12763|1:NA12892|1	CNVR3311.1
7	22401328	7	22403288	DEL	1960	NA06986|1:NA07051|1:NA07346|2:NA07347|2:NA07357|1:NA11829|1:NA11830|1:NA11831|2:NA11894|1:NA11918|1:NA11919|1:NA11931|1:NA11992|1:NA11993|1:NA11994|1:NA11995|1:NA12003|1:NA12006|2:NA12043|1:NA12144|1:NA12154|1:NA12155|1:NA12156|1:NA12249|2:NA12287|1:NA12489|1:NA12749|1:NA12751|1:NA12761|1:NA12776|2:NA12813|1:NA12878|2:NA12891|2:NA12892|1	CNVR3314.1
7	52930697	7	52932410	DEL	1713	NA12006|1:NA12154|1:NA12155|1:NA12156|1:NA12749|1:NA12891|1	CNVR3389.2
7	54563980	7	54564927	DEL	947	NA07000|1:NA11830|1:NA11994|1	CNVR3394.1
7	89648345	7	89650537	DEL	2192	NA07000|2:NA07051|1:NA07346|1:NA07347|1:NA07357|1:NA11829|1:NA11830|2:NA11831|1:NA11881|1:NA11894|1:NA11918|2:NA11920|1:NA11992|1:NA11993|1:NA11994|1:NA11995|1:NA12003|1:NA12006|1:NA12043|2:NA12044|2:NA12045|1:NA12155|1:NA12716|2:NA12749|1:NA12750|1:NA12751|1:NA12761|1:NA12763|1:NA12776|1:NA12813|2:NA12828|1:NA12878|1:NA12891|1:NA12892|1	CNVR3485.1
7	98066481	7	98068689	DEL	2208	NA12156|1	CNVR3503.1
7	115718878	7	115728486	DEL	9608	NA06986|1:NA06994|1:NA07346|1:NA07347|1:NA11830|1:NA11931|1:NA12045|1	CNVR3539.1
7	125833125	7	125838686	DEL	5561	NA06986|1:NA06994|2:NA07000|1:NA07051|1:NA07347|1:NA07357|1:NA11829|1:NA11830|1:NA11881|1:NA11918|1:NA11919|1:NA11920|2:NA11992|1:NA11993|1:NA11995|1:NA12003|1:NA12044|1:NA12045|1:NA12154|1:NA12156|2:NA12249|1:NA12489|1:NA12716|1:NA12749|1:NA12751|1:NA12763|1:NA12776|1:NA12813|2:NA12828|2:NA12878|2:NA12891|1:NA12892|1	CNVR3559.1
7	127002204	7	127005218	DEL	3014	NA06986|1:NA07000|1:NA07357|1:NA11829|2:NA11830|1:NA11831|1:NA11881|1:NA11894|1:NA11992|1:NA11993|1:NA11995|2:NA12003|2:NA12006|1:NA12043|1:NA12045|1:NA12144|1:NA12154|1:NA12155|1:NA12287|1:NA12716|2:NA12749|1:NA12751|1:NA12761|1:NA12763|1:NA12776|1:NA12813|1:NA12828|1:NA12878|1:NA12892|1	CNVR3563.1
7	133435543	7	133448872	DEL	13329	NA06986|2:NA07037|1:NA07051|1:NA07346|1:NA07357|2:NA11829|1:NA11831|2:NA11881|1:NA11931|1:NA11992|1:NA11993|1:NA11995|2:NA12003|1:NA12006|2:NA12044|1:NA12045|1:NA12155|2:NA12156|1:NA12249|1:NA12287|1:NA12489|1:NA12716|1:NA12749|1:NA12750|1:NA12751|1:NA12763|2:NA12813|1:NA12828|2	CNVR3573.1
7	147703799	7	147707262	DEL	3463	NA06986|1:NA06994|2:NA07000|2:NA07037|1:NA07051|1:NA07346|1:NA07347|2:NA07357|2:NA11829|2:NA11830|2:NA11831|2:NA11894|2:NA11918|2:NA11919|1:NA11920|2:NA11931|1:NA11992|2:NA11994|2:NA11995|1:NA12003|2:NA12006|1:NA12043|1:NA12044|1:NA12045|1:NA12144|2:NA12154|2:NA12155|1:NA12156|2:NA12249|2:NA12287|1:NA12489|2:NA12716|1:NA12749|2:NA12750|2:NA12751|2:NA12761|2:NA12763|2:NA12776|1:NA12813|1:NA12828|2…	CNVR3609.1
8	5582924	8	5593187	DEL	10263	NA06986|1:NA11919|1:NA11931|1:NA11994|1:NA12045|1:NA12155|1:NA12751|1	CNVR3760.1
8	11282971	8	11284620	DEL	1649	NA06994|2:NA07000|1:NA07037|1:NA07346|2:NA07347|1:NA11829|1:NA11881|2:NA11894|2:NA11918|1:NA11919|1:NA11920|1:NA11992|1:NA11993|1:NA11995|2:NA12003|1:NA12006|1:NA12043|1:NA12044|2:NA12045|1:NA12144|1:NA12154|1:NA12156|1:NA12489|1:NA12716|1:NA12749|1:NA12751|1:NA12761|2:NA12776|1:NA12813|1:NA12878|2:NA12891|1:NA12892|1	CNVR3781.1
8	25028351	8	25046862	DEL	18511	NA06994|2:NA07037|1:NA07347|2:NA07357|1:NA11829|1:NA11881|1:NA11918|1:NA11920|2:NA11931|1:NA11993|1:NA11995|1:NA12006|1:NA12044|1:NA12045|1:NA12144|1:NA12249|1:NA12287|2:NA12489|1:NA12716|1:NA12749|1:NA12750|1:NA12761|1:NA12776|1:NA12813|2:NA12878|1:NA12891|1:NA12892|1	CNVR3830.1
8	25122602	8	25126576	DEL	3974	NA06986|2:NA06994|2:NA07000|2:NA07037|1:NA07346|2:NA07347|2:NA07357|2:NA11829|2:NA11830|2:NA11831|2:NA11881|1:NA11894|1:NA11918|2:NA11919|1:NA11920|2:NA11931|2:NA11992|2:NA11993|1:NA11994|1:NA11995|1:NA12003|2:NA12006|1:NA12043|1:NA12044|1:NA12045|2:NA12144|2:NA12154|1:NA12155|1:NA12249|2:NA12287|2:NA12489|1:NA12716|1:NA12749|2:NA12750|1:NA12751|2:NA12761|2:NA12763|2:NA12776|2:NA12813|2:NA12828|2…	CNVR3831.1
8	39351231	8	39506385	DEL	155154	NA06986|1:NA06994|1:NA07051|1:NA07346|1:NA07347|1:NA11829|2:NA11830|1:NA11831|1:NA11919|2:NA11920|2:NA11992|2:NA11994|1:NA12006|1:NA12043|1:NA12044|1:NA12045|2:NA12144|2:NA12154|2:NA12155|1:NA12156|2:NA12249|2:NA12287|1:NA12716|2:NA12750|1:NA12763|1:NA12813|2:NA12828|1:NA12878|1:NA12891|2:NA12892|1	CNVR3859.1
8	49255939	8	49256532	DEL	593	NA07357|1:NA11931|1:NA12006|1:NA12043|1:NA12878|1:NA12892|1	CNVR3878.1
8	51193644	8	51200882	DEL	7238	NA06994|1:NA07357|1:NA11829|2:NA11830|1:NA11881|2:NA12044|2:NA12144|1:NA12156|1:NA12249|1:NA12287|1:NA12489|1:NA12763|1:NA12891|1	CNVR3882.1
8	75525426	8	75529531	DEL	4105	NA06986|1:NA06994|2:NA07000|1:NA07037|1:NA07051|2:NA07346|1:NA07347|2:NA07357|1:NA11829|2:NA11830|1:NA11881|1:NA11894|1:NA11918|1:NA11920|2:NA11931|1:NA11992|2:NA11993|2:NA12044|2:NA12045|1:NA12144|2:NA12154|2:NA12155|1:NA12156|2:NA12249|1:NA12287|2:NA12489|1:NA12716|2:NA12749|1:NA12751|1:NA12761|2:NA12776|2:NA12813|2:NA12878|2:NA12891|2:NA12892|2	CNVR3935.1
8	82207573	8	82209183	DEL	1610	NA07000|1:NA07037|1:NA07051|1:NA07347|1:NA11829|1:NA11831|1:NA11881|1:NA11894|1:NA11918|2:NA11919|1:NA11995|1:NA12006|1:NA12043|1:NA12489|1:NA12716|1:NA12750|1:NA12751|1:NA12761|1:NA12776|1:NA12891|1	CNVR3946.2
8	85423525	8	85431728	DEL	8203	NA06986|1:NA07357|1:NA12003|1	CNVR3952.1
8	120223725	8	120230432	DEL	6707	NA07000|1:NA07051|1:NA12006|1:NA12045|1:NA12716|1:NA12813|1:NA12878|1:NA12891|1	CNVR4031.1
8	131919931	8	131921920	DEL	1989	NA06986|1:NA07000|1:NA07037|1:NA07347|1:NA11829|1:NA11894|2:NA11920|1:NA11992|1:NA11993|1:NA11994|1:NA11995|1:NA12006|1:NA12045|2:NA12287|1:NA12716|1:NA12750|2:NA12751|1:NA12761|1:NA12763|1:NA12776|1:NA12828|1:NA12878|1:NA12891|1:NA12892|1	CNVR4052.1
8	137229379	8	137233082	DEL	3703	NA06986|2:NA07000|1:NA07037|1:NA07051|1:NA07346|1:NA07347|1:NA07357|2:NA11829|2:NA11830|1:NA11831|1:NA11881|1:NA11894|2:NA11918|1:NA11919|1:NA11920|2:NA11992|1:NA11993|1:NA11995|1:NA12003|1:NA12006|2:NA12043|2:NA12045|1:NA12144|1:NA12154|2:NA12155|2:NA12156|1:NA12249|1:NA12287|2:NA12489|2:NA12749|2:NA12750|1:NA12751|1:NA12761|1:NA12776|1:NA12813|2:NA12828|2:NA12878|2:NA12891|2:NA12892|1	CNVR4067.1
9	4366421	9	4367644	DEL	1223	NA06986|1:NA06994|1:NA07000|1:NA07051|1:NA07346|1:NA07357|1:NA11829|1:NA11830|1:NA11881|1:NA11918|2:NA11931|2:NA11993|1:NA11994|1:NA12003|1:NA12006|1:NA12044|2:NA12045|1:NA12144|1:NA12156|1:NA12249|1:NA12489|1:NA12716|1:NA12751|1:NA12763|2:NA12813|1:NA12828|1:NA12878|1:NA12891|1	CNVR4153.2
9	8630851	9	8631666	DEL	815	NA11831|1:NA12878|1:NA12891|1	CNVR4174.1
9	10394564	9	10395094	DEL	530	NA06986|2:NA06994|2:NA07037|2:NA07051|2:NA07346|1:NA07357|2:NA11829|2:NA11830|1:NA11831|2:NA11881|1:NA11894|2:NA11918|2:NA11919|2:NA11920|2:NA11931|1:NA11992|2:NA11993|2:NA11994|2:NA11995|1:NA12003|2:NA12006|1:NA12043|2:NA12044|2:NA12045|2:NA12144|2:NA12154|2:NA12155|2:NA12156|2:NA12249|2:NA12287|2:NA12489|1:NA12716|2:NA12749|2:NA12750|2:NA12751|2:NA12761|2:NA12763|2:NA12776|2:NA12813|2:NA12828|2…	CNVR4181.1
9	23352801	9	23367685	DEL	14884	NA06986|1:NA06994|2:NA07346|2:NA07347|1:NA11830|2:NA11831|1:NA11881|1:NA11894|1:NA11919|2:NA11920|1:NA11931|1:NA11994|2:NA12003|1:NA12006|1:NA12043|2:NA12044|2:NA12154|2:NA12156|1:NA12249|1:NA12287|1:NA12489|2:NA12750|1:NA12751|1:NA12761|1:NA12763|1:NA12776|1:NA12813|1:NA12878|1:NA12892|2	CNVR4213.1
9	31281356	9	31282673	DEL	1317	NA06986|2:NA06994|1:NA07346|2:NA07357|1:NA11829|1:NA11830|2:NA11831|1:NA11881|2:NA11918|1:NA11920|1:NA11931|1:NA11992|1:NA11993|1:NA11995|1:NA12006|1:NA12044|1:NA12045|1:NA12144|2:NA12287|2:NA12716|1:NA12749|2:NA12751|1:NA12761|2:NA12763|1:NA12828|1:NA12878|1:NA12891|2:NA12892|1	CNVR4234.1
9	100348869	9	100351490	DEL	2621	NA06986|2:NA07000|1:NA07037|1:NA07051|1:NA07346|1:NA07347|1:NA07357|1:NA11830|2:NA11831|1:NA11881|1:NA11894|1:NA11918|1:NA11919|1:NA11920|1:NA11992|1:NA11994|2:NA12003|1:NA12006|1:NA12043|1:NA12044|1:NA12144|2:NA12156|2:NA12287|2:NA12489|1:NA12716|1:NA12749|1:NA12751|1:NA12776|1:NA12813|1:NA12828|2:NA12878|2:NA12891|2:NA12892|1	CNVR4414.1
9	129221443	9	129225901	DEL	4458	NA11995|1:NA12144|1:NA12155|1:NA12716|1:NA12761|1	CNVR4479.1
9	137353887	9	137357424	DEL	3537	NA06986|2:NA06994|1:NA07000|2:NA07051|1:NA07346|2:NA07347|1:NA07357|1:NA11829|1:NA11894|1:NA11918|1:NA11919|1:NA11931|1:NA11992|2:NA11994|1:NA11995|1:NA12003|2:NA12044|2:NA12045|1:NA12144|1:NA12156|1:NA12249|2:NA12287|1:NA12716|1:NA12749|2:NA12751|1:NA12761|1:NA12763|2:NA12813|2:NA12828|1:NA12878|1:NA12891|1:NA12892|2	CNVR4527.1
