# Supplementary material for: TIGRA: A targeted iterative graph routing assembler for breakpoint assembly
Source: HighWire-hosted journal article supplement (doi:10.1101/gr.162883.113), 2013-12-04
Supplement: Supplemental_Table2.xlsx [file Supplemental_Table2.xlsx]

## Sheet: genotype_ignored
TIGRA parameter optimization based 245 Conrad et al. CEU deletions
w	θ	Num correct assembly
1000	0	208
1000	10	208
400	0	208
500	0	208
600	0	208
600	10	208
800	0	208
800	10	208
900	0	208
900	10	208
300	0	207
400	10	207
500	10	207
700	0	207
700	10	207
300	10	205
1000	20	204
400	20	204
500	20	204
600	20	204
800	20	204
900	20	204
700	20	203
300	20	202
1000	30	185
400	30	185
800	30	185
900	30	185
300	30	184
500	30	184
600	30	184
700	30	183
1000	40	175
1000	500	175
300	40	175
400	40	175
400	500	175
500	40	175
500	500	175
600	40	175
600	500	175
700	500	175
800	40	175
800	500	175
900	40	175
900	500	175
300	500	174
700	40	174
1000	100	173
1000	150	173
1000	200	173
1000	50	173
1000	60	173
1000	70	173
1000	80	173
1000	90	173
300	100	173
300	150	173
300	200	173
300	50	173
300	60	173
300	70	173
300	80	173
300	90	173
400	100	173
400	150	173
400	200	173
400	50	173
400	60	173
400	70	173
400	80	173
400	90	173
500	100	173
500	150	173
500	200	173
500	50	173
500	60	173
500	70	173
500	80	173
500	90	173
600	100	173
600	150	173
600	200	173
600	50	173
600	60	173
600	70	173
600	80	173
600	90	173
700	100	173
700	150	173
700	200	173
700	50	173
700	60	173
700	70	173
700	80	173
700	90	173
800	100	173
800	150	173
800	200	173
800	50	173
800	60	173
800	80	173
800	90	173
900	100	173
900	150	173
900	200	173
900	50	173
900	60	173
900	70	173
900	80	173
900	90	173
800	70	172

## Sheet: genotype_aware
TIGRA parameter optimization based 245 Conrad et al. CEU deletions
w	θ	Num correct assembly
1000	10	225
1000	20	225
600	10	224
700	10	224
700	20	224
800	10	224
800	20	224
900	10	224
900	20	224
1000	0	224
1000	30	224
400	10	223
400	20	223
500	10	223
500	20	223
600	20	223
700	30	223
800	30	223
900	30	223
300	10	222
300	20	222
400	30	222
500	30	222
600	0	222
600	30	222
700	0	222
800	0	222
900	0	222
300	30	221
400	0	221
500	0	221
300	0	220
1000	40	217
300	40	216
400	40	216
700	40	216
900	40	216
500	40	215
800	40	215
600	40	214
300	50	206
400	50	206
1000	50	206
500	50	205
700	50	205
800	50	205
900	50	205
600	50	204
300	60	198
400	60	198
500	60	197
700	60	197
800	60	197
900	60	197
1000	60	197
600	60	196
700	500	195
800	500	195
900	500	195
1000	500	195
300	70	194
300	80	194
300	90	194
300	100	194
300	150	194
300	200	194
300	500	194
400	70	194
400	80	194
400	90	194
400	100	194
400	150	194
400	200	194
400	500	194
600	500	194
700	70	194
700	80	194
700	90	194
700	100	194
700	150	194
700	200	194
800	70	194
800	80	194
800	100	194
800	150	194
800	200	194
900	70	194
900	80	194
900	90	194
900	100	194
900	150	194
1000	70	194
1000	80	194
1000	90	194
1000	100	194
1000	150	194
500	70	193
500	80	193
500	90	193
500	100	193
500	150	193
500	200	193
500	500	193
600	70	193
600	80	193
600	90	193
600	100	193
600	150	193
600	200	193
800	90	193
900	200	193
1000	200	193
