# Supplementary material for: TIGRA: A targeted iterative graph routing assembler for breakpoint assembly
Source: HighWire-hosted journal article supplement (doi:10.1101/gr.162883.113), 2013-12-04
Supplement: Supplemental_Table3.xlsx [file Supplemental_Table3.xlsx]

## Sheet: kidd.8samp.bd
Chr1	Pos1	Chr2	Pos2	Type	Size	Sample
1	111376881	1	111388955	DEL	12073	NA18517
1	176590628	1	176613322	DEL	22693	NA18517
1	207707878	1	207745705	DEL	37826	NA18517
1	207707878	1	207745705	DEL	37826	NA18517
10	42701551	10	42716794	DEL	15242	NA18517
10	100687885	10	100702357	DEL	14471	NA18517
2	234648331	2	234660024	DEL	11692	NA18517
22	42519214	22	42531380	DEL	12165	NA18517
3	114656952	3	114668608	DEL	11655	NA18517
4	70467470	4	70472803	DEL	5332	NA18517
4	88268243	4	88274316	DEL	6072	NA18517
8	73787765	8	73793834	DEL	6068	NA18517
X	134951200	X	134968800	DEL	17599	NA18517
1	196722205	1	196808506	DEL	86300	NA18507
11	93695220	11	93702086	DEL	6865	NA18507
12	33296553	12	33307373	DEL	10819	NA18507
14	73996961	14	74024983	DEL	28021	NA18507
15	56667038	15	56896395	DEL	229356	NA18507
17	39383270	17	39395556	DEL	12285	NA18507
2	24599953	2	24611529	DEL	11575	NA18507
2	79331525	2	79339583	DEL	8057	NA18507
2	203295425	2	203312935	DEL	17509	NA18507
20	1560991	20	1594261	DEL	33269	NA18507
3	46795504	3	46851319	DEL	55814	NA18507
3	89509964	3	89516022	DEL	6057	NA18507
4	75642740	4	75648813	DEL	6072	NA18507
4	172988639	4	172992932	DEL	4292	NA18507
6	24811875	6	24817963	DEL	6087	NA18507
6	86709135	6	86714821	DEL	5685	NA18507
6	165724666	6	165732135	DEL	7468	NA18507
7	48391722	7	48401876	DEL	10153	NA18507
8	63215349	8	63225231	DEL	9881	NA18507
9	73316717	9	73352708	DEL	35990	NA18507
9	122291405	9	122304642	DEL	13236	NA18507
1	9846650	1	9856696	DEL	10045	NA18956
1	24804536	1	24807450	DEL	2913	NA18956
1	25158687	1	25161526	DEL	2838	NA18956
1	72766324	1	72811841	DEL	45516	NA18956
1	84517925	1	84524644	DEL	6718	NA18956
1	95522259	1	95525940	DEL	3680	NA18956
1	106015814	1	106023399	DEL	7584	NA18956
1	108921141	1	108995632	DEL	74490	NA18956
1	110187163	1	110191422	DEL	4258	NA18956
1	110225620	1	110244986	DEL	19365	NA18956
1	112691790	1	112704706	DEL	12915	NA18956
1	145294860	1	145301186	DEL	6325	NA18956
1	158867530	1	158869985	DEL	2454	NA18956
1	175070481	1	175076673	DEL	6191	NA18956
1	187464828	1	187466730	DEL	1901	NA18956
1	196782713	1	196904671	DEL	121957	NA18956
1	207541963	1	207545637	DEL	3673	NA18956
1	210078055	1	210085978	DEL	7922	NA18956
1	229812533	1	229820841	DEL	8307	NA18956
1	236549086	1	236551347	DEL	2260	NA18956
10	12561022	10	12562010	DEL	987	NA18956
10	17310711	10	17315510	DEL	4798	NA18956
10	27638254	10	27642097	DEL	3842	NA18956
10	42701551	10	42716794	DEL	15242	NA18956
10	48898099	10	48909929	DEL	11829	NA18956
10	58845457	10	58851146	DEL	5688	NA18956
10	71281003	10	71291120	DEL	10116	NA18956
10	88984194	10	89117946	DEL	133751	NA18956
10	111572110	10	111578231	DEL	6120	NA18956
10	114112181	10	114116661	DEL	4479	NA18956
10	122226654	10	122228809	DEL	2154	NA18956
11	4968155	11	4976981	DEL	8825	NA18956
11	55364522	11	55457751	DEL	93228	NA18956
11	92869786	11	92875869	DEL	6082	NA18956
11	92968001	11	92972695	DEL	4693	NA18956
11	93154135	11	93158580	DEL	4444	NA18956
11	93679229	11	93681425	DEL	2195	NA18956
11	104267748	11	104273233	DEL	5484	NA18956
12	8558485	12	8590848	DEL	32362	NA18956
12	9632903	12	9732037	DEL	99133	NA18956
12	16018667	12	16021666	DEL	2998	NA18956
12	22575200	12	22582379	DEL	7178	NA18956
12	29844381	12	29846439	DEL	2057	NA18956
12	33385104	12	33398360	DEL	13255	NA18956
12	58721907	12	58730700	DEL	8792	NA18956
12	66527635	12	66530378	DEL	2742	NA18956
12	90487100	12	90491696	DEL	4595	NA18956
12	102102406	12	102107091	DEL	4684	NA18956
12	105369052	12	105373550	DEL	4497	NA18956
13	32532644	13	32538806	DEL	6161	NA18956
13	47039528	13	47041768	DEL	2239	NA18956
13	49533506	13	49536622	DEL	3115	NA18956
13	51069346	13	51075083	DEL	5736	NA18956
13	63315757	13	63632892	DEL	317134	NA18956
14	20550866	14	20555662	DEL	4795	NA18956
14	65360386	14	65363551	DEL	3164	NA18956
14	73997412	14	74025259	DEL	27846	NA18956
14	82499109	14	82503329	DEL	4219	NA18956
15	20581463	15	20589632	DEL	8168	NA18956
15	33906532	15	33910717	DEL	4184	NA18956
15	55218215	15	55224440	DEL	6224	NA18956
15	68426002	15	68428946	DEL	2943	NA18956
15	84541434	15	84543849	DEL	2414	NA18956
17	39421712	17	39432086	DEL	10373	NA18956
17	51442981	17	51447479	DEL	4497	NA18956
18	14799957	18	14811249	DEL	11291	NA18956
18	51952963	18	51956964	DEL	4000	NA18956
19	8191310	19	8194047	DEL	2736	NA18956
19	30388803	19	30393115	DEL	4311	NA18956
19	31287472	19	31289759	DEL	2286	NA18956
19	40613089	19	40615776	DEL	2686	NA18956
19	52133768	19	52150223	DEL	16454	NA18956
19	54800860	19	54807621	DEL	6760	NA18956
2	4781291	2	4787376	DEL	6084	NA18956
2	33224462	2	33227293	DEL	2830	NA18956
2	59623256	2	59631049	DEL	7792	NA18956
2	89160418	2	89442066	DEL	281647	NA18956
2	105825891	2	105828443	DEL	2551	NA18956
2	126443247	2	126451836	DEL	8588	NA18956
2	129638419	2	129646206	DEL	7786	NA18956
2	146862619	2	146876865	DEL	14245	NA18956
2	151785214	2	151789238	DEL	4023	NA18956
2	153666725	2	153798040	DEL	131314	NA18956
2	167844952	2	167851218	DEL	6265	NA18956
2	170641507	2	170643963	DEL	2455	NA18956
2	208474482	2	208476798	DEL	2315	NA18956
2	223865089	2	223869879	DEL	4789	NA18956
2	227165424	2	227171172	DEL	5747	NA18956
20	1560991	20	1594261	DEL	33269	NA18956
20	1560991	20	1594261	DEL	33269	NA18956
20	42271864	20	42274624	DEL	2759	NA18956
20	54434610	20	54440630	DEL	6019	NA18956
22	18057750	22	18060478	DEL	2727	NA18956
22	20950622	22	20953841	DEL	3218	NA18956
22	24274142	22	24311300	DEL	37157	NA18956
22	24343050	22	24398994	DEL	55943	NA18956
22	37143169	22	37147903	DEL	4733	NA18956
22	39358280	22	39388567	DEL	30286	NA18956
3	228771	3	234409	DEL	5637	NA18956
3	4066924	3	4069569	DEL	2644	NA18956
3	22092347	3	22097810	DEL	5462	NA18956
3	53027148	3	53038899	DEL	11750	NA18956
3	68634770	3	68640257	DEL	5486	NA18956
3	68739688	3	68747866	DEL	8177	NA18956
3	83853115	3	83855363	DEL	2247	NA18956
3	131989091	3	131995085	DEL	5993	NA18956
3	146385190	3	146390405	DEL	5214	NA18956
3	162764901	3	162769085	DEL	4183	NA18956
3	186581015	3	186585303	DEL	4287	NA18956
4	4128618	4	4159329	DEL	30710	NA18956
4	9457173	4	9481584	DEL	24410	NA18956
4	10211260	4	10234575	DEL	23314	NA18956
4	16944237	4	16950760	DEL	6522	NA18956
4	21160986	4	21167114	DEL	6127	NA18956
4	21369092	4	21376908	DEL	7815	NA18956
4	30819213	4	30830142	DEL	10928	NA18956
4	75642740	4	75648813	DEL	6072	NA18956
4	80888046	4	80894108	DEL	6061	NA18956
4	91596785	4	91602922	DEL	6136	NA18956
4	108276696	4	108279510	DEL	2813	NA18956
4	113498208	4	113501238	DEL	3029	NA18956
4	139468861	4	139473257	DEL	4395	NA18956
4	168418308	4	168424010	DEL	5701	NA18956
4	190057998	4	190064289	DEL	6290	NA18956
4	190191600	4	190200466	DEL	8865	NA18956
5	7917046	5	7920559	DEL	3512	NA18956
5	57323476	5	57333781	DEL	10304	NA18956
5	57679992	5	57686111	DEL	6118	NA18956
5	103854274	5	103860341	DEL	6066	NA18956
5	114325356	5	114334997	DEL	9640	NA18956
5	127407439	5	127410921	DEL	3481	NA18956
5	150177655	5	150181601	DEL	3945	NA18956
5	150203163	5	150223264	DEL	20100	NA18956
6	19765106	6	19771204	DEL	6097	NA18956
6	35626432	6	35629747	DEL	3314	NA18956
6	65711005	6	65715718	DEL	4712	NA18956
6	74592060	6	74602442	DEL	10381	NA18956
6	86709135	6	86714821	DEL	5685	NA18956
6	133341820	6	133347900	DEL	6079	NA18956
6	134589674	6	134594570	DEL	4895	NA18956
6	153029971	6	153033809	DEL	3837	NA18956
7	20748784	7	20753580	DEL	4795	NA18956
7	32390151	7	32393127	DEL	2975	NA18956
7	49719838	7	49725908	DEL	6069	NA18956
7	56217740	7	56220259	DEL	2518	NA18956
7	72270262	7	72275846	DEL	5583	NA18956
7	93416927	7	93423006	DEL	6078	NA18956
7	96475886	7	96482010	DEL	6123	NA18956
7	102132404	7	102232153	DEL	99748	NA18956
7	102875319	7	102877886	DEL	2566	NA18956
7	112512995	7	112520708	DEL	7712	NA18956
7	113416161	7	113422223	DEL	6061	NA18956
7	148072863	7	148076327	DEL	3463	NA18956
8	594400	8	599416	DEL	5015	NA18956
8	3786013	8	3790751	DEL	4737	NA18956
8	6991662	8	6995410	DEL	3747	NA18956
8	7355390	8	7364866	DEL	9475	NA18956
8	16201309	8	16207531	DEL	6221	NA18956
8	32680005	8	32691266	DEL	11260	NA18956
8	40774622	8	40779790	DEL	5167	NA18956
8	42190431	8	42194403	DEL	3971	NA18956
8	94072345	8	94077193	DEL	4847	NA18956
8	115633900	8	115645899	DEL	11998	NA18956
8	129762519	8	129766029	DEL	3509	NA18956
8	144700484	8	144714696	DEL	14211	NA18956
9	17909417	9	17912880	DEL	3462	NA18956
9	90530340	9	90533916	DEL	3575	NA18956
9	96500160	9	96503046	DEL	2885	NA18956
9	104714843	9	104724485	DEL	9641	NA18956
9	110537520	9	110540613	DEL	3092	NA18956
9	113024576	9	113029966	DEL	5389	NA18956
9	134260502	9	134266007	DEL	5504	NA18956
X	11953185	X	11959450	DEL	6264	NA18956
X	55702379	X	55709807	DEL	7427	NA18956
X	78946448	X	78948837	DEL	2388	NA18956
X	85605171	X	85609876	DEL	4704	NA18956
X	92796296	X	92801508	DEL	5211	NA18956
X	140083744	X	140099389	DEL	15644	NA18956
X	154790189	X	154803271	DEL	13081	NA18956
1	207718756	1	207737660	DEL	18903	NA19240
1	247850462	1	247856529	DEL	6066	NA19240
1	248867187	1	248876094	DEL	8906	NA19240
10	28503272	10	28511810	DEL	8537	NA19240
10	114112181	10	114116661	DEL	4479	NA19240
10	126068939	10	126074492	DEL	5552	NA19240
10	135238293	10	135383589	DEL	145295	NA19240
11	5873984	11	5883499	DEL	9514	NA19240
11	7811173	11	7833382	DEL	22208	NA19240
11	57754444	11	57762114	DEL	7669	NA19240
11	65933898	11	65939340	DEL	5441	NA19240
11	116668365	11	116673691	DEL	5325	NA19240
12	27648142	12	27655165	DEL	7022	NA19240
12	34207411	12	34216820	DEL	9408	NA19240
12	47028576	12	47033309	DEL	4732	NA19240
12	82215444	12	82225364	DEL	9919	NA19240
12	90890336	12	90899190	DEL	8853	NA19240
12	126783503	12	126789612	DEL	6108	NA19240
13	92386317	13	92392370	DEL	6052	NA19240
14	20550706	14	20555387	DEL	4680	NA19240
14	21349675	14	21413835	DEL	64159	NA19240
14	22908005	14	22918107	DEL	10101	NA19240
14	23094866	14	23098685	DEL	3818	NA19240
14	40609814	14	40617673	DEL	7858	NA19240
14	106084509	14	106105079	DEL	20569	NA19240
15	71021839	15	71027523	DEL	5683	NA19240
15	71708609	15	71713691	DEL	5081	NA19240
15	75549328	15	75576965	DEL	27636	NA19240
17	6871554	17	6877178	DEL	5623	NA19240
17	55089713	17	55092825	DEL	3111	NA19240
18	36656875	18	36666711	DEL	9835	NA19240
18	46997698	18	47005317	DEL	7618	NA19240
18	47824957	18	47828994	DEL	4036	NA19240
18	47870303	18	47876374	DEL	6070	NA19240
18	51952963	18	51956965	DEL	4001	NA19240
18	64959013	18	64967263	DEL	8249	NA19240
18	65295573	18	65317247	DEL	21673	NA19240
19	9274510	19	9284364	DEL	9853	NA19240
19	12694876	19	12698939	DEL	4062	NA19240
2	6298293	2	6308721	DEL	10427	NA19240
2	19767581	2	19770565	DEL	2983	NA19240
2	71342538	2	71347886	DEL	5347	NA19240
2	114526817	2	114531702	DEL	4884	NA19240
2	136098340	2	136101574	DEL	3233	NA19240
2	173179979	2	173186122	DEL	6142	NA19240
2	194689501	2	194698767	DEL	9265	NA19240
20	1560991	20	1594261	DEL	33269	NA19240
20	32815928	20	32819236	DEL	3307	NA19240
20	43275100	20	43278309	DEL	3208	NA19240
21	11089794	21	11092559	DEL	2764	NA19240
21	38151272	21	38157782	DEL	6509	NA19240
3	17540876	3	17545681	DEL	4804	NA19240
3	22279328	3	22286418	DEL	7089	NA19240
3	132718604	3	132723924	DEL	5319	NA19240
3	177381315	3	177385418	DEL	4102	NA19240
3	189091987	3	189100077	DEL	8089	NA19240
4	28943956	4	28952807	DEL	8850	NA19240
4	29226569	4	29233969	DEL	7399	NA19240
4	57539966	4	57544736	DEL	4769	NA19240
4	79269120	4	79275210	DEL	6089	NA19240
4	119125411	4	119130204	DEL	4792	NA19240
4	139468861	4	139473257	DEL	4395	NA19240
4	151875562	4	151885940	DEL	10377	NA19240
4	178375043	4	178386600	DEL	11556	NA19240
5	30487152	5	30495694	DEL	8541	NA19240
5	107619303	5	107629595	DEL	10291	NA19240
5	121576115	5	121580825	DEL	4709	NA19240
6	85318143	6	85324229	DEL	6085	NA19240
6	139603442	6	139607718	DEL	4275	NA19240
6	150643434	6	150647842	DEL	4407	NA19240
6	166497640	6	166502590	DEL	4949	NA19240
7	26136992	7	26145525	DEL	8532	NA19240
7	141620467	7	141626523	DEL	6055	NA19240
7	152574767	7	152580325	DEL	5557	NA19240
8	963587	8	967520	DEL	3932	NA19240
8	48066059	8	48072483	DEL	6423	NA19240
8	60996549	8	61007777	DEL	11227	NA19240
8	85260966	8	85269174	DEL	8207	NA19240
8	94237416	8	94243604	DEL	6187	NA19240
8	96875225	8	96879594	DEL	4368	NA19240
8	130435195	8	130442879	DEL	7683	NA19240
9	514141	9	527934	DEL	13792	NA19240
9	642168	9	648240	DEL	6071	NA19240
X	11725352	X	11731414	DEL	6061	NA19240
X	72819036	X	72831775	DEL	12738	NA19240
X	95315825	X	95318884	DEL	3058	NA19240
X	139494873	X	139502966	DEL	8092	NA19240
X	142561950	X	142565458	DEL	3507	NA19240
X	146843674	X	146849812	DEL	6137	NA19240
1	50528698	1	50541902	DEL	13203	NA18555
1	106015816	1	106023399	DEL	7582	NA18555
1	145124812	1	145183371	DEL	58558	NA18555
1	197500508	1	197503284	DEL	2775	NA18555
1	207541963	1	207545637	DEL	3673	NA18555
10	69325894	10	69346602	DEL	20707	NA18555
10	78346589	10	78351593	DEL	5003	NA18555
10	94134599	10	94137620	DEL	3020	NA18555
10	132909058	10	132912784	DEL	3725	NA18555
11	55031599	11	55038545	DEL	6945	NA18555
11	92869786	11	92875869	DEL	6082	NA18555
11	106786237	11	106789571	DEL	3333	NA18555
11	112549644	11	112553455	DEL	3810	NA18555
12	82104482	12	82109048	DEL	4565	NA18555
12	82139715	12	82144324	DEL	4608	NA18555
13	57251077	13	57256253	DEL	5175	NA18555
14	28869843	14	28872164	DEL	2320	NA18555
14	35605614	14	35615083	DEL	9468	NA18555
15	23671444	15	23675258	DEL	3813	NA18555
16	10414682	16	10423371	DEL	8688	NA18555
17	15043901	17	15058721	DEL	14819	NA18555
18	23747805	18	23751331	DEL	3525	NA18555
18	66745594	18	66757004	DEL	11409	NA18555
19	19834443	19	19839666	DEL	5222	NA18555
2	19188205	2	19225225	DEL	37019	NA18555
2	56652305	2	56655895	DEL	3589	NA18555
2	154446087	2	154453068	DEL	6980	NA18555
2	176346668	2	176352736	DEL	6067	NA18555
20	7096781	20	7102859	DEL	6077	NA18555
21	23654900	21	23666004	DEL	11103	NA18555
22	16364977	22	16370665	DEL	5687	NA18555
3	22092347	3	22097810	DEL	5462	NA18555
3	32102050	3	32107886	DEL	5835	NA18555
3	47490667	3	47493443	DEL	2775	NA18555
3	129763380	3	129806748	DEL	43367	NA18555
3	131708253	3	131713385	DEL	5131	NA18555
3	140544403	3	140547048	DEL	2644	NA18555
3	148281434	3	148285426	DEL	3991	NA18555
3	162512133	3	162626336	DEL	114202	NA18555
3	162717311	3	162723555	DEL	6243	NA18555
4	19079450	4	19085566	DEL	6115	NA18555
4	91931556	4	91935838	DEL	4281	NA18555
4	115175125	4	115183839	DEL	8713	NA18555
4	115507821	4	115513865	DEL	6043	NA18555
4	122282249	4	122289954	DEL	7704	NA18555
4	138092000	4	138100636	DEL	8635	NA18555
4	145316445	4	145319908	DEL	3462	NA18555
4	167677036	4	167683084	DEL	6047	NA18555
5	3657088	5	3660546	DEL	3457	NA18555
5	41226813	5	41243968	DEL	17154	NA18555
5	87279157	5	87291815	DEL	12657	NA18555
5	108595074	5	108601137	DEL	6062	NA18555
5	146394711	5	146397303	DEL	2591	NA18555
6	19041186	6	19049424	DEL	8237	NA18555
6	31421497	6	31424393	DEL	2895	NA18555
6	51739562	6	51745616	DEL	6053	NA18555
6	57622877	6	57628054	DEL	5176	NA18555
6	69687694	6	69691833	DEL	4138	NA18555
6	78426919	6	78435552	DEL	8632	NA18555
6	103737466	6	103762890	DEL	25423	NA18555
6	118077366	6	118084617	DEL	7250	NA18555
6	126183044	6	126187357	DEL	4312	NA18555
6	164543446	6	164547192	DEL	3745	NA18555
7	151134	7	160558	DEL	9423	NA18555
7	91031083	7	91042585	DEL	11501	NA18555
7	137991842	7	138004097	DEL	12254	NA18555
8	12335265	8	12348243	DEL	12977	NA18555
8	12388847	8	12395515	DEL	6667	NA18555
8	24145307	8	24151086	DEL	5778	NA18555
8	24972432	8	24990946	DEL	18513	NA18555
8	25066678	8	25070660	DEL	3981	NA18555
8	51224982	8	51228318	DEL	3335	NA18555
8	75362871	8	75367000	DEL	4128	NA18555
9	38863129	9	38874495	DEL	11365	NA18555
9	133383125	9	133387423	DEL	4297	NA18555
9	140975935	9	140982026	DEL	6090	NA18555
X	44519510	X	44526704	DEL	7193	NA18555
X	69731340	X	69734212	DEL	2871	NA18555
X	143406969	X	143409976	DEL	3006	NA18555
1	17071423	1	17073212	DEL	1788	NA12878
1	75842768	1	75849144	DEL	6375	NA12878
1	158961351	1	158966206	DEL	4854	NA12878
1	189704507	1	189783359	DEL	78851	NA12878
1	248674073	1	248682567	DEL	8493	NA12878
10	78255572	10	78261026	DEL	5453	NA12878
11	81856413	11	81863346	DEL	6932	NA12878
11	134601978	11	134607666	DEL	5687	NA12878
12	292228	12	297968	DEL	5739	NA12878
12	377496	12	384834	DEL	7337	NA12878
13	23632435	13	23637303	DEL	4867	NA12878
13	30215837	13	30228124	DEL	12286	NA12878
13	72477264	13	72480578	DEL	3313	NA12878
13	72807622	13	72812359	DEL	4736	NA12878
14	80106288	14	80115052	DEL	8763	NA12878
15	101094610	15	101098596	DEL	3985	NA12878
16	19945550	16	19967585	DEL	22034	NA12878
16	29450226	16	29556530	DEL	106303	NA12878
16	62544333	16	62550669	DEL	6335	NA12878
17	51852787	17	51860748	DEL	7960	NA12878
18	47694973	18	47698387	DEL	3413	NA12878
19	20595810	19	20717974	DEL	122163	NA12878
19	35661079	19	35665800	DEL	4720	NA12878
19	46622734	19	46628317	DEL	5582	NA12878
2	3732805	2	3738029	DEL	5223	NA12878
2	4212676	2	4223479	DEL	10802	NA12878
2	34695829	2	34736568	DEL	40738	NA12878
2	151031137	2	151038249	DEL	7111	NA12878
2	170105115	2	170111181	DEL	6065	NA12878
2	204181662	2	204191741	DEL	10078	NA12878
2	208351152	2	208359372	DEL	8219	NA12878
20	31525488	20	31529388	DEL	3899	NA12878
3	65188869	3	65214751	DEL	25881	NA12878
4	107604296	4	107609258	DEL	4961	NA12878
4	108127808	4	108131735	DEL	3926	NA12878
4	116166907	4	116177181	DEL	10273	NA12878
5	13416591	5	13422870	DEL	6278	NA12878
5	26796698	5	26801900	DEL	5201	NA12878
5	83947917	5	83955337	DEL	7419	NA12878
5	104432113	5	104503673	DEL	71559	NA12878
5	137807485	5	137816933	DEL	9447	NA12878
5	178109061	5	178113417	DEL	4355	NA12878
6	58423849	6	58428867	DEL	5017	NA12878
6	78967191	6	79036418	DEL	69226	NA12878
6	132106601	6	132108789	DEL	2187	NA12878
6	132114228	6	132118549	DEL	4320	NA12878
6	132707546	6	132712422	DEL	4875	NA12878
7	25057444	7	25059871	DEL	2426	NA12878
7	39820097	7	39825207	DEL	5109	NA12878
7	156387173	7	156394320	DEL	7146	NA12878
8	42190431	8	42194403	DEL	3971	NA12878
8	120154542	8	120161218	DEL	6675	NA12878
9	15815306	9	15821944	DEL	6637	NA12878
9	110537520	9	110540613	DEL	3092	NA12878
X	67123829	X	67130302	DEL	6472	NA12878
X	81096641	X	81102705	DEL	6063	NA12878
X	81982363	X	81988171	DEL	5807	NA12878
X	126597760	X	126602400	DEL	4639	NA12878
1	248051478	1	248057653	DEL	6174	NA19129
10	5287299	10	5293364	DEL	6064	NA19129
10	75373789	10	75381209	DEL	7419	NA19129
11	76672826	11	76677823	DEL	4996	NA19129
11	128311493	11	128316093	DEL	4599	NA19129
12	15568481	12	15573620	DEL	5138	NA19129
12	45903153	12	45909940	DEL	6786	NA19129
12	64399408	12	64405869	DEL	6460	NA19129
12	86695694	12	86703067	DEL	7372	NA19129
13	48778651	13	48785786	DEL	7134	NA19129
14	35115086	14	35122262	DEL	7175	NA19129
15	22336853	15	22344094	DEL	7240	NA19129
15	23992086	15	23995944	DEL	3857	NA19129
15	27918865	15	27927870	DEL	9004	NA19129
15	76336611	15	76346711	DEL	10099	NA19129
16	21791339	16	22608600	DEL	817260	NA19129
16	25340109	16	25343130	DEL	3020	NA19129
16	33755019	16	33761094	DEL	6074	NA19129
19	9863578	19	9871838	DEL	8259	NA19129
2	11395188	2	11400430	DEL	5241	NA19129
2	35975984	2	35997183	DEL	21198	NA19129
2	43887560	2	43893656	DEL	6095	NA19129
2	47326962	2	47334521	DEL	7558	NA19129
2	147941344	2	147946810	DEL	5465	NA19129
2	180065450	2	180081689	DEL	16238	NA19129
2	209942968	2	209948950	DEL	5981	NA19129
20	2803147	20	2806425	DEL	3277	NA19129
21	20836930	21	20843327	DEL	6396	NA19129
3	58534778	3	58537334	DEL	2555	NA19129
3	164302193	3	164311939	DEL	9745	NA19129
4	42762677	4	42769544	DEL	6866	NA19129
4	59944559	4	59950608	DEL	6048	NA19129
4	70123701	4	70232426	DEL	108724	NA19129
4	94559439	4	94565506	DEL	6066	NA19129
4	107056578	4	107063363	DEL	6784	NA19129
4	172374411	4	172379427	DEL	5015	NA19129
4	184311857	4	184315198	DEL	3340	NA19129
4	184655817	4	184658986	DEL	3168	NA19129
4	187843677	4	187850411	DEL	6733	NA19129
5	28245681	5	28253291	DEL	7609	NA19129
5	114254932	5	114261431	DEL	6498	NA19129
6	22167186	6	22175940	DEL	8753	NA19129
6	26677215	6	26686349	DEL	9133	NA19129
6	29851101	6	29906015	DEL	54913	NA19129
6	52797406	6	52803846	DEL	6439	NA19129
6	77016710	6	77029163	DEL	12452	NA19129
6	84734639	6	84739277	DEL	4637	NA19129
6	105260826	6	105263760	DEL	2933	NA19129
6	121795569	6	121800351	DEL	4781	NA19129
6	129319515	6	129325590	DEL	6074	NA19129
7	56652479	7	56658527	DEL	6047	NA19129
7	56761980	7	56769952	DEL	7971	NA19129
7	78803912	7	78854063	DEL	50150	NA19129
7	93327142	7	93332282	DEL	5139	NA19129
7	102366700	7	102374331	DEL	7630	NA19129
7	111250349	7	111256579	DEL	6229	NA19129
7	126045886	7	126051451	DEL	5564	NA19129
7	126776176	7	126781419	DEL	5242	NA19129
7	143684866	7	143690367	DEL	5500	NA19129
7	149862840	7	149881964	DEL	19123	NA19129
8	13614131	8	13651413	DEL	37281	NA19129
8	14506984	8	14515235	DEL	8250	NA19129
8	25410678	8	25416639	DEL	5960	NA19129
8	37389886	8	37395604	DEL	5717	NA19129
8	40774622	8	40779790	DEL	5167	NA19129
8	75311432	8	75330084	DEL	18651	NA19129
8	129465153	8	129471282	DEL	6128	NA19129
9	36362881	9	36364095	DEL	1213	NA19129
9	128971096	9	128978455	DEL	7358	NA19129
1	16151943	1	16155433	DEL	3489	NA12156
1	26460095	1	26464807	DEL	4711	NA12156
1	66024173	1	66030283	DEL	6109	NA12156
1	108733324	1	108737252	DEL	3927	NA12156
1	112835087	1	112837684	DEL	2596	NA12156
1	180749768	1	180755398	DEL	5629	NA12156
1	184814728	1	184820800	DEL	6071	NA12156
1	192970436	1	192993624	DEL	23187	NA12156
10	5889559	10	5892845	DEL	3285	NA12156
10	31246747	10	31251770	DEL	5022	NA12156
10	57219515	10	57291540	DEL	72024	NA12156
10	96867192	10	96874943	DEL	7750	NA12156
11	31393773	11	31397650	DEL	3876	NA12156
11	47057588	11	47063704	DEL	6115	NA12156
11	49116301	11	49119641	DEL	3339	NA12156
11	49125619	11	49127644	DEL	2024	NA12156
12	13546015	12	13552187	DEL	6171	NA12156
12	39477923	12	39483139	DEL	5215	NA12156
12	70594846	12	70597596	DEL	2749	NA12156
13	51069346	13	51075083	DEL	5736	NA12156
15	35530935	15	35536021	DEL	5085	NA12156
15	100416661	15	100423239	DEL	6577	NA12156
18	76202119	18	76203357	DEL	1237	NA12156
2	31725182	2	31727393	DEL	2210	NA12156
2	66185965	2	66197063	DEL	11097	NA12156
2	87133695	2	87145277	DEL	11581	NA12156
2	134966700	2	134970148	DEL	3447	NA12156
2	217089943	2	217093112	DEL	3168	NA12156
20	7398707	20	7403595	DEL	4887	NA12156
20	39882495	20	39886713	DEL	4217	NA12156
21	16588378	21	16591455	DEL	3076	NA12156
3	89670044	3	89678088	DEL	8043	NA12156
3	98899060	3	98902393	DEL	3332	NA12156
3	111243620	3	111249034	DEL	5413	NA12156
4	21160986	4	21167114	DEL	6127	NA12156
4	61939189	4	61942246	DEL	3056	NA12156
4	69063685	4	69069632	DEL	5946	NA12156
4	91596785	4	91602922	DEL	6136	NA12156
4	146919578	4	146927743	DEL	8164	NA12156
4	186441635	4	186444076	DEL	2440	NA12156
5	60001704	5	60003671	DEL	1966	NA12156
5	132918964	5	132925007	DEL	6042	NA12156
6	54846381	6	54851446	DEL	5064	NA12156
6	72863851	6	72873538	DEL	9686	NA12156
7	91214216	7	91220750	DEL	6533	NA12156
7	100327572	7	100340731	DEL	13158	NA12156
7	118831248	7	118834755	DEL	3506	NA12156
7	133785000	7	133798333	DEL	13332	NA12156
8	8286301	8	8290831	DEL	4529	NA12156
8	40182853	8	40189818	DEL	6964	NA12156
8	109103022	8	109111158	DEL	8135	NA12156
9	22496527	9	22504345	DEL	7817	NA12156
9	83967917	9	83970692	DEL	2774	NA12156
9	101309043	9	101311670	DEL	2626	NA12156
