# Supplementary material for: TIGRA: A targeted iterative graph routing assembler for breakpoint assembly
Source: HighWire-hosted journal article supplement (doi:10.1101/gr.162883.113), 2013-12-04
Supplement: Supplemental_Table4.xlsx [file Supplemental_Table4.xlsx]

## Sheet: MEI_subtypes
TIGRA assembled							dbRIP			1000 Genotype, Steward et al.
Chr	Start	End	Subtype	Subfamily	Contig Size	MEI size	Type	SubType	Subfamiiy	Subtype	Subfamily
chr1	105231105	105231106	ALU	ALUY	1054	111	SINE	Alu	AluY	ALU
chr1	111896172	111896173	SVA	SVA	276	258				SVA
chr1	112991992	112991993	ALU	ALUYA5	328	278	SINE	Alu	Ya5	ALU	AluYa5
chr1	119080690	119080691	ALU	ALUYA5	1248	282	SINE	Alu	Ya5	ALU	AluYa5
chr1	146658205	146658206	ALU	ALUYA5	330	277	SINE	Alu	Ya5	ALU	AluYa5
chr1	15490123	15490124	ALU	ALUSX	1974	249				ALU
chr1	170603433	170603434	ALU	ALUYD8	318	267				ALU	AluYd8
chr1	181588343	181588344	ALU	ALUYB8	1251	289				ALU	AluYb8
chr1	181601265	181601266	ALU	ALUYA5	297	247				ALU	AluYa5
chr1	182420839	182420840	ALU	ALUYA4	1273	279				ALU	AluYa5
chr1	185504700	185504701	ALU	ALUYB8	336	285				ALU
chr1	188174640	188174641	ALU	ALUYA5	1258	244				ALU
chr1	188186448	188186449	ALU	ALUYB8	2166	284				ALU
chr1	189247022	189247023	ALU	ALUYA8	328	275	SINE	Alu	AluYa8	ALU	AluYa8
chr1	191817410	191817411	ALU	ALUYA5	329	282				ALU	AluYa5
chr1	198243292	198243293	ALU	ALUY	295	248				ALU	AluY
chr1	198469337	198469338	ALU	ALUYA5	329	278				ALU
chr1	20257081	20257082	ALU	ALUYA5	329	282				ALU	AluYa5
chr1	204238454	204238455	ALU	ALUYG6	1268	274				ALU	AluYg6
chr1	218755932	218755933	ALU	ALUYB8	336	287				ALU
chr1	221969165	221969166	ALU	ALUY	321	282				ALU
chr1	222870682	222870683	ALU	ALUYB8	339	287	SINE	Alu	AluYb8	ALU	AluYb8
chr1	225996421	225996422	ALU	ALUYA5	345	278				ALU	AluYa5
chr1	232587759	232587760	ALU	ALUYA1	1586	277	SINE	Alu	AluY	ALU	AluY
chr1	234070548	234070549	ALU	ALUYA5	329	281	SINE	Alu	Ya5	ALU	AluYa5
chr1	234805711	234805712	ALU	ALUYA5	329	276				ALU	AluYa5
chr1	237967613	237967614	ALU	ALUYA4	1939	264				ALU	AluYa5
chr1	23981123	23981124	ALU	ALUYA4	1257	277				ALU	AluYa5
chr1	245989306	245989307	ALU	ALUYA5	1232	278	SINE	Alu	AluYa5	ALU	AluYa5
chr1	246406700	246406701	L1	L1	976	588				ALU
chr1	37215794	37215795	ALU	ALUYB8	336	287				ALU
chr1	44208901	44208902	ALU	ALUYA4	2227	260				ALU
chr1	49428724	49428725	L1	L1HS	336	307				L1
chr1	58071863	58071864	ALU	ALUY	1471	186				ALU
chr1	5934289	5934290	ALU	ALUYB8	1222	249				ALU
chr1	64958063	64958064	ALU	ALUYB8	1232	288	SINE	Alu	AluYb8	ALU	AluYb8
chr1	70061652	70061653	ALU	ALUYB8	1902	283	SINE	Alu	AluYb8	ALU	AluYb8
chr1	72514105	72514106	ALU	ALUYE5	328	271				ALU	AluYf4
chr1	79108836	79108837	ALU	ALUYB8	1032	101				ALU
chr1	80299101	80299102	ALU	ALUYB9	1172	241	SINE	Alu	Yb9	ALU	AluYb9
chr1	81524114	81524115	ALU	ALUYA5	1192	282				ALU	AluYa5
chr1	89219385	89219386	ALU	ALUYB8	319	271				ALU	AluYb8
chr10	107891546	107891547	ALU	ALUYC1	2136	269	SINE	Alu	Yc1	ALU	AluY
chr10	117006326	117006327	ALU	ALUYB8	330	281	SINE	Alu	Yb7	ALU	AluYb8
chr10	123228972	123228973	ALU	ALUYH9	323	274				ALU	AluYh9
chr10	124735985	124735986	ALU	ALUYC1	331	278	SINE	Alu	AluY	ALU	AluY
chr10	14396697	14396698	ALU	ALUYA4	328	282				ALU	AluYa5
chr10	21688230	21688231	ALU	ALUYA4	1439	278				ALU
chr10	25707685	25707686	L1	L1HS	1285	319				L1
chr10	27929915	27929916	ALU	ALUYB8	335	287				ALU	AluYb8
chr10	29102526	29102527	ALU	ALUYA5	1217	278	SINE	Alu	AluYa5	ALU	AluYa5
chr10	3569002	3569003	ALU	ALUYG6	326	277	SINE	Alu	Yg6	ALU	AluYg6
chr10	35995053	35995054	L1	L1PA13	1228	332				ALU	AluY
chr10	36593617	36593618	ALU	ALUYB8	336	285				ALU	AluYb8
chr10	48419943	48419944	ALU	ALUYA5	306	264	SINE	Alu	Ya5	ALU	AluYa5
chr10	54805954	54805955	ALU	ALUYE5	1082	273	SINE	Alu	AluY	ALU	AluYf4
chr10	60984902	60984903	ALU	ALUYA5	328	280	SINE	Alu	Ya5	ALU	AluYa5
chr10	62124845	62124846	ALU	ALUYB8	1217	259	SINE	Alu	AluYb8	ALU	AluYb8
chr10	68084650	68084651	ALU	ALUYA5	2149	280	SINE	Alu	Ya5	ALU
chr10	68217398	68217399	ALU	ALUYB8	339	279				ALU	AluYb8
chr10	70361587	70361588	ALU	ALUYC1	329	280				ALU	AluY
chr10	71308731	71308732	ALU	ALUY	335	277	SINE	Alu	AluY	ALU
chr10	71610159	71610160	ALU	ALUYA5	321	279	SINE	Alu	Ya5	ALU	AluYa5
chr10	73193531	73193532	ALU	ALUY	357	271	SINE	Alu	Ya1	ALU	AluY
chr10	89373665	89373666	ALU	ALUYB8	336	287				ALU	AluYb9
chr10	89814959	89814960	ALU	ALUYA5	330	276	SINE	Alu	Ya5	ALU
chr10	9474844	9474845	ALU	ALUYA5	1227	282				ALU	AluYa5
chr10	9510980	9510981	ALU	ALUYA5	1269	279				ALU	AluYa5
chr10	98418581	98418582	ALU	ALUYA1	1128	146				ALU
chr10	9904391	9904392	ALU	ALUY	329	270				ALU	AluY
chr11	100781378	100781379	ALU	ALUYB8	336	289	SINE	Alu	AluYb8	ALU	AluYb8
chr11	102348313	102348314	ALU	ALUYA5	234	185	SINE	Alu	AluYa5	ALU	AluYa5
chr11	103201265	103201266	ALU	ALUYB8	1232	283				ALU	AluYb8
chr11	104144737	104144738	ALU	ALUYA5	329	282				ALU
chr11	106044561	106044562	ALU	ALUYA5	329	280	SINE	Alu	Ya5	ALU	AluYa5
chr11	106170466	106170467	ALU	ALUYA5	1243	282	SINE	Alu	AluYa5	ALU	AluYa5
chr11	126941116	126941117	ALU	ALUYC2	1069	281				ALU	AluY
chr11	130675909	130675910	ALU	ALUY	1254	262	SINE	Alu	AluY	ALU	AluY
chr11	134305632	134305633	L1	L1HS	2151	296				L1
chr11	23522790	23522791	ALU	ALUYB8	336	285	SINE	Alu	AluYb8	ALU
chr11	24792940	24792941	ALU	ALUYA5	1197	279	SINE	Alu	Ya5	ALU	AluYa5
chr11	26293257	26293258	ALU	ALUYB8	298	251				ALU
chr11	27039965	27039966	ALU	ALUYA4	184	153				ALU	AluYa5
chr11	38801059	38801060	ALU	ALUYA5	1245	280	SINE	Alu	Ya5	ALU	AluYa5
chr11	41831802	41831803	L1	L1HS	390	346				L1	?
chr11	57774102	57774103	ALU	ALUSZ	1070	188	SINE	Alu	AluYa5/8	ALU	AluYa8
chr11	61145199	61145200	ALU	ALUYB3A2	1045	260	SINE	Alu	Yx	ALU	AluYk12
chr11	65503474	65503475	ALU	ALUYC1	335	280	SINE	Alu	Yc1	ALU	AluY
chr11	72320910	72320911	ALU	ALUYA4	330	278	SINE	Alu	AluYa5	ALU
chr11	85542966	85542967	ALU	ALUYA4	322	278				ALU
chr11	8887300	8887301	ALU	ALUY	2149	266				ALU
chr12	10234185	10234186	ALU	ALUYC1	1150	277	SINE	Alu	Yc1	ALU	AluY
chr12	126889862	126889863	ALU	ALUYA5	325	278				ALU	AluYa5
chr12	12933682	12933683	L1	L1HS	356	328				L1
chr12	15104632	15104633	ALU	ALUYC1	329	270				ALU	AluY
chr12	18896171	18896172	ALU	ALUYA5	305	257				ALU
chr12	2089839	2089840	ALU	ALUYA5	1221	276				ALU
chr12	20908669	20908670	ALU	ALUYB9	1245	286				ALU	AluYb9
chr12	22085937	22085938	L1	L1PA13	1816	690				ALU
chr12	25462930	25462931	ALU	ALUYA5	335	275				ALU	AluYa5
chr12	26697596	26697597	ALU	ALUYA5	1230	279				ALU
chr12	26958657	26958658	ALU	ALUSQ	1209	142				ALU
chr12	27864794	27864795	ALU	ALUYA5	1228	279				ALU	AluYa5
chr12	28274575	28274576	ALU	ALUYB8	337	282				ALU	AluYb8
chr12	31120729	31120730	ALU	ALUYA4	325	276				ALU	AluYa5
chr12	31406634	31406635	ALU	ALUYA4	329	280				ALU	AluYa5
chr12	43717927	43717928	ALU	ALUYB8	336	285	SINE	Alu	AluYb8	ALU	AluYb8
chr12	46175159	46175160	ALU	ALUYB3A1	1224	261				ALU	AluY
chr12	58359057	58359058	ALU	ALUYG6	328	274				ALU	AluYg6
chr12	59219043	59219044	ALU	ALUYB8	335	287				ALU	AluYb8
chr12	75931084	75931085	ALU	ALUYG6	328	272	SINE	Alu	AluYg6	ALU	AluYg6
chr12	7603973	7603974	ALU	ALUYA5	296	245	SINE	Alu	AluYa5	ALU	AluYa5
chr12	76823040	76823041	ALU	ALUYB8	331	283				ALU	AluYb8
chr12	77275713	77275714	ALU	ALUYA5	1255	280				ALU
chr12	84086110	84086111	ALU	ALUYB8	335	289				ALU	AluYb8
chr12	87870813	87870814	ALU	ALUYC1	1218	278	SINE	Alu	Yc1	ALU	AluY
chr12	88338151	88338152	ALU	ALUYA5	1321	282	SINE	Alu	Ya5	ALU	AluYa5
chr12	88579483	88579484	ALU	ALUYA5	174	127				ALU
chr13	100082613	100082614	ALU	ALUYA1	1226	280	SINE	Alu	Yc1	ALU	AluY
chr13	105714921	105714922	ALU	ALUYB8	299	251				ALU	AluYb8
chr13	108669011	108669012	ALU	ALUYA4	849	276	SINE	Alu	Ya4	ALU
chr13	29538874	29538875	ALU	ALUYA5	331	279	SINE	Alu	AluYa5	ALU	AluYa5
chr13	34738954	34738955	ALU	ALUYB8	300	254	SINE	Alu	AluYb8	ALU	AluYb8
chr13	42571546	42571547	ALU	ALUYB8	336	287				ALU	AluYb8
chr13	42940070	42940071	ALU	ALUYB8	889	287	SINE	Alu	Yb7	ALU	AluYb8
chr13	50042749	50042750	ALU	ALUYB8	337	287				ALU
chr13	53433775	53433776	ALU	ALUYA5	330	280				ALU	AluYa5
chr13	56186559	56186560	ALU	ALUY	329	256				ALU	AluY
chr13	58761414	58761415	ALU	ALUYE5	327	275				ALU
chr13	59396878	59396879	ALU	ALUYG6	843	274	SINE	Alu	Yg6	ALU	AluYg6
chr13	61162456	61162457	ALU	ALUYB8	348	289				ALU	AluYb8
chr13	61462330	61462331	L1	L1HS	1249	318				L1
chr13	61734483	61734484	L1	L1HS	326	298				L1	?
chr13	62588960	62588961	ALU	ALUYA5	357	279				ALU	AluYa5
chr13	62721062	62721063	ALU	ALUYA5	1261	278				ALU	AluYa5
chr13	67903459	67903460	ALU	ALUYE5	1138	192	SINE	Alu	Ye5	ALU	AluYf4
chr13	69670750	69670751	ALU	ALUYA5	1016	107	SINE	Alu	AluYa5/8	ALU
chr13	78584663	78584664	ALU	ALUYA5	328	280	SINE	Alu	AluYa5	ALU	AluYa5
chr13	79259784	79259785	L1	L1HS	1258	342				L1
chr13	79271583	79271584	ALU	ALUYA4	1230	278	SINE	Alu	AluYa5	ALU	AluYa5
chr13	85473566	85473567	ALU	ALUYA1	231	178				ALU
chr13	86340148	86340149	L1	L1HS	354	299				L1
chr13	87392948	87392949	ALU	ALUYA5	1203	251	SINE	Alu	Ya5a2	ALU	AluYa5
chr13	90550557	90550558	ALU	ALUYE5	372	272	SINE	Alu	Ye5	ALU	AluYf4
chr13	91626216	91626217	L1	L1HS	1243	303				L1
chr13	92161659	92161660	ALU	ALUYB8	336	284	SINE	Alu	AluYb8	ALU	AluYb8
chr13	92261270	92261271	ALU	ALUYG6	1249	278	SINE	Alu	Yg6	ALU	AluYg6
chr13	92513961	92513962	ALU	ALUYA5	301	253	SINE	Alu	AluYa5	ALU	AluYa5
chr13	98734893	98734894	ALU	ALUYA4	2073	278	SINE	Alu	AluYa5	ALU
chr14	20484295	20484296	ALU	ALUYB8	325	281	SINE	Alu	AluYb8	ALU	AluYb8
chr14	34493337	34493338	ALU	ALUYA5	1226	278				ALU	AluYa5
chr14	38359621	38359622	ALU	ALUYI6	1242	279	SINE	Alu	Yi6	ALU	AluY
chr14	40312946	40312947	ALU	ALUYA4	1233	281	SINE	Alu	Ya4	ALU	AluYa5
chr14	40579674	40579675	ALU	ALUYA5	1234	282				ALU	AluYa5
chr14	45014063	45014064	ALU	ALUYA5	595	280				ALU	AluYa5
chr14	47836087	47836088	ALU	ALUYB8	336	287	SINE	Alu	AluYb8	ALU
chr14	51432079	51432080	ALU	ALUYB8	335	289	SINE	Alu	AluYb8	ALU	AluYb8
chr14	55795851	55795852	ALU	ALUY	329	278				ALU	AluY
chr14	57507987	57507988	ALU	ALUYA5	331	279				ALU	AluYa5
chr14	60575485	60575486	ALU	ALUYA5	1199	280	SINE	Alu	Ya5	ALU	AluYa5
chr14	65015033	65015034	ALU	ALUYB8	2145	281				ALU	AluYb9
chr14	71480267	71480268	ALU	ALUYB8	345	284				ALU	AluYb8
chr14	74942140	74942141	ALU	ALUYC1	329	282				ALU	AluY
chr14	75499565	75499566	ALU	ALUYA5	430	278	SINE	Alu	AluYa5	ALU
chr14	77116227	77116228	ALU	ALUYB9	328	289				ALU	AluYb9
chr14	78982695	78982696	ALU	ALUYB8	336	287				ALU	AluYb8
chr14	84632724	84632725	ALU	ALUYC1	340	282				ALU	AluY
chr14	93830918	93830919	ALU	ALUYC1	1794	276				ALU
chr14	97151835	97151836	ALU	ALUYC1	289	243				ALU	AluY
chr15	26141233	26141234	ALU	ALUYA5	330	275				ALU
chr15	28174959	28174960	ALU	ALUY	160	87	SINE	Alu	AluY	ALU	AluYc
chr15	34031837	34031838	L1	L1HS	1239	301				L1
chr15	63287070	63287071	ALU	ALUYA5	344	276				ALU	AluYa5
chr15	70747296	70747297	ALU	ALUYB8	337	286				ALU	AluYb8
chr15	73983309	73983310	ALU	ALUYA5	342	279				ALU
chr15	79795872	79795873	ALU	ALUYA5	327	276				ALU	AluYa5
chr15	95165013	95165014	ALU	ALUY	338	276				ALU
chr15	97585935	97585936	ALU	ALUYB8	324	274				ALU	AluYb9
chr16	24327564	24327565	ALU	ALUYA5	328	278				ALU	AluYa5
chr16	53874965	53874966	ALU	ALUYB8	347	284				ALU	AluYb8
chr16	55292014	55292015	L1	L1HS	348	322				L1
chr16	56075092	56075093	ALU	ALUYG6	328	274				ALU
chr16	60041146	60041147	ALU	ALUYA4	369	280	SINE	Alu	AluYa5	ALU	AluYa5
chr16	71028007	71028008	ALU	ALUYA4	369	280				L1
chr16	80696981	80696982	ALU	ALUYA5	331	279				ALU	AluYa5
chr16	81278005	81278006	ALU	ALUYA5	329	274				ALU
chr16	82164680	82164681	ALU	ALUYC1	950	254	SINE	Alu	AluY	ALU	AluY
chr16	82912103	82912104	ALU	ALUYA5	329	274	SINE	Alu	Ya5	ALU
chr17	14527642	14527643	ALU	ALUYA5	355	278	SINE	Alu	Ya5	ALU	AluYa5
chr17	36169328	36169329	ALU	ALUYA4	823	276				ALU	AluYa5
chr17	54947561	54947562	ALU	ALUYH9	1221	260	SINE	Alu	AluYh9	ALU	AluYh9
chr17	68357397	68357398	L1	L1HS	354	326				L1
chr17	76347303	76347304	ALU	ALUYB8	1227	269				ALU
chr18	1235775	1235776	ALU	ALUYC2	1246	277	SINE	Alu	Yc2	ALU	AluY
chr18	1830653	1830654	ALU	ALUYE5	344	273				ALU	AluYf4
chr18	19705149	19705150	ALU	ALUYA5	3055	272				ALU
chr18	27156353	27156354	ALU	ALUYB8	354	287				ALU	AluYb8
chr18	29003599	29003600	L1	L1PA16	922	377	SINE	Alu	AluY	ALU	AluY
chr18	36512525	36512526	ALU	ALUYA5	329	278	SINE	Alu	Ya5	ALU	AluYa5
chr18	4355868	4355869	ALU	ALUYB8	774	267				ALU	AluYb8
chr18	50986539	50986540	L1	L1PA3	800	756				ALU	AluYb8
chr18	54357058	54357059	ALU	ALUYB8	336	285				ALU
chr18	54706179	54706180	ALU	ALUYB8	332	289	SINE	Alu	Yb7	ALU	AluYb8
chr18	57372756	57372757	ALU	ALUYA5	1257	280				ALU	AluYa5
chr18	59713718	59713719	ALU	ALUYA5	353	276				ALU	AluYa5
chr18	68438275	68438276	ALU	ALUYA5	311	257				ALU
chr19	38031442	38031443	ALU	ALUYA4	3324	274				ALU
chr19	57023564	57023565	ALU	ALUYA5	330	279				ALU	AluYa5
chr19	57425514	57425515	ALU	ALUY	1722	278	SINE	Alu	Y	ALU	AluY
chr2	112447421	112447422	ALU	ALUYI6	332	274	SINE	Alu	AluY	ALU	AluY
chr2	112716542	112716543	ALU	ALUYE5	332	274				ALU
chr2	11353685	11353686	ALU	ALUYA5	344	280	SINE	Alu	AluYa5	ALU	AluYa5
chr2	126641625	126641626	ALU	ALUYB8	984	289				ALU
chr2	141534054	141534055	ALU	ALUYB8	336	287				ALU	AluYb8
chr2	142114148	142114149	ALU	ALUYA5	330	279				ALU	AluYa5
chr2	147020923	147020924	L1	L1HS	1253	301				L1
chr2	148650062	148650063	ALU	ALUYB9	316	269	SINE	Alu	AluYb9	ALU	AluYb9
chr2	153248263	153248264	ALU	ALUYG6	1238	276				ALU
chr2	15519531	15519532	ALU	ALUYC1	2130	280	SINE	Alu	AluY	ALU	AluY
chr2	173316722	173316723	ALU	ALUYA5	2960	281				ALU	AluYa5
chr2	178676244	178676245	L1	L1PA2	249	190				L1
chr2	185761555	185761556	ALU	ALUYA5	329	280				ALU
chr2	189163017	189163018	ALU	ALUYB8	1225	272				ALU	AluYb8
chr2	189959423	189959424	ALU	ALUYA5	323	278	SINE	Alu	Ya5	ALU	AluYa5
chr2	198763448	198763449	ALU	ALUYA4	303	251				ALU	AluYa5
chr2	210260739	210260740	ALU	ALUYB3A2	327	260				ALU
chr2	215201630	215201631	ALU	ALUYB8	1230	280	SINE	Alu	AluYb8	ALU	AluYb8
chr2	21796809	21796810	ALU	ALUYD8	1224	270	SINE	Alu	Yd8	ALU	AluYd8
chr2	219576592	219576593	ALU	ALUYA4	2136	282				ALU	AluYa5
chr2	223882867	223882868	L1	L1PA5	1229	715	SINE	Alu	AluYd8	ALU	AluYd8
chr2	226753675	226753676	ALU	ALUYB8	382	287	SINE	Alu	AluYb8	ALU
chr2	233845875	233845876	ALU	ALUYA4	2146	282				ALU	AluYa5
chr2	2539932	2539933	ALU	ALUYE5	328	275	SINE	Alu	AluY	ALU	AluYf4
chr2	31527454	31527455	ALU	ALUYB8	257	214				ALU
chr2	31559678	31559679	ALU	ALUYA5	1241	282	SINE	Alu	AluYa5	ALU	AluYa5
chr2	40613671	40613672	ALU	ALUYB8	1249	282				ALU	AluYb8
chr2	44825834	44825835	ALU	ALUYA4	1327	282				ALU	AluYa5
chr2	46928949	46928950	ALU	ALUYA5	1245	265	SINE	Alu	AluYa5	ALU
chr2	47319279	47319280	ALU	ALUY	2366	251				ALU
chr2	49780405	49780406	ALU	ALUYB8	337	287				ALU
chr2	50602628	50602629	ALU	ALUYB8	336	287				ALU	AluYb8
chr2	65163759	65163760	ALU	ALUYE5	328	273				ALU	AluYf4
chr2	65746450	65746451	SVA	SVA	292	245				SVA
chr2	66658976	66658977	ALU	ALUYE5	1292	275	SINE	Alu	AluY	ALU
chr2	74125478	74125479	ALU	ALUYA4	2585	270	SINE	Alu	Ya5	ALU	AluYa5
chr2	78965411	78965412	ALU	ALUYA5	330	281				ALU
chr2	80769007	80769008	ALU	ALUYA5	311	249				ALU	AluYa5
chr20	29638559	29638560	SVA	SVA	1781	465				L1	?
chr20	8670601	8670602	ALU	ALUYD8	2131	270				ALU	AluYd8
chr21	19517297	19517298	L1	L1HS	807	332				L1
chr21	37237926	37237927	L1	L1PA6	915	743				ALU
chr22	22534121	22534122	ALU	ALUYA5	1242	276				ALU	AluYa5
chr22	23872665	23872666	ALU	ALUYB8	1070	281				ALU	AluYb8
chr22	34430598	34430599	ALU	ALUYB8	340	280				ALU	AluYb8
chr3	100177244	100177245	ALU	ALUYA5	345	278	SINE	Alu	Ya5	ALU	AluYa5
chr3	101432369	101432370	ALU	ALUYA5	2425	282				ALU	AluYa5
chr3	103453379	103453380	ALU	ALUYA1	1227	272	SINE	Alu	Ya3	ALU	AluYa5
chr3	110271022	110271023	ALU	ALUYA5	329	282	SINE	Alu	Ya5	ALU
chr3	111226359	111226360	ALU	ALUYB9	1023	286	SINE	Alu	AluYb9	ALU	AluYb9
chr3	112453483	112453484	ALU	ALUYA4	309	258	SINE	Alu	AluYa5	ALU	AluYa5
chr3	113047144	113047145	ALU	ALUYB8	338	285				ALU	AluYb8
chr3	114915079	114915080	ALU	ALUY	329	278				ALU
chr3	115018204	115018205	ALU	ALUYA4	330	282				ALU
chr3	12818451	12818452	ALU	ALUYB8	381	282				ALU	AluYb8
chr3	151148542	151148543	L1	L1HS	348	310				L1
chr3	156239876	156239877	ALU	ALUYA5	348	282	SINE	Alu	AluYa5	ALU	AluYa5
chr3	171626387	171626388	ALU	ALUYA5	331	277				ALU	AluYa5
chr3	172322945	172322946	ALU	ALUSG	948	220				ALU	AluYa8
chr3	174250895	174250896	ALU	ALUYG6	325	276				ALU	AluYg6
chr3	174410735	174410736	ALU	ALUYB8	1222	287	SINE	Alu	AluYb8	ALU	AluYb8
chr3	184273577	184273578	ALU	ALUYE5	2773	246				ALU
chr3	188883211	188883212	ALU	ALUYB8	334	289				ALU	AluYb8
chr3	194768516	194768517	ALU	ALUYA5	331	279				ALU	AluYa5
chr3	2961987	2961988	ALU	ALUY	2190	272				ALU	AluY
chr3	38399696	38399697	ALU	ALUYB8	2893	273				ALU	AluYb8
chr3	4205143	4205144	ALU	ALUYA5	375	282	SINE	Alu	AluYa5	ALU	AluYa5
chr3	42898408	42898409	ALU	ALUYB8	336	289				ALU
chr3	45542652	45542653	ALU	ALUYA4	1239	277	SINE	Alu	AluYa5	ALU	AluYa5
chr3	50879158	50879159	ALU	ALUYB8	1236	285				ALU	AluYb9
chr3	67570467	67570468	ALU	ALUYA4	196	149				ALU	?
chr3	74255406	74255407	ALU	ALUYC1	326	282				ALU
chr3	87520468	87520469	ALU	ALUYA5	291	238	SINE	Alu	Ya5a2	ALU
chr3	88478153	88478154	ALU	ALUYA4	3091	245				ALU
chr4	104744600	104744601	ALU	ALUYA5	2141	282	SINE	Alu	Ya5	ALU	AluYa5
chr4	10722282	10722283	ALU	ALUY	1121	176	SINE	Alu	AluY	ALU
chr4	110934961	110934962	ALU	ALUYA5	328	282				ALU
chr4	115549905	115549906	ALU	ALUYB8	1191	287				ALU	AluYb8
chr4	1301816	1301817	ALU	ALUY	1243	280	SINE	Alu	AluY	ALU	AluY
chr4	138177323	138177324	L1	L1PA2	320	307				L1
chr4	138189280	138189281	ALU	ALUYI6	332	280				ALU
chr4	139225197	139225198	ALU	ALUYI6	331	275	SINE	Alu	AluY	ALU	AluY
chr4	145395289	145395290	ALU	ALUYA5	329	280				ALU	AluYa5
chr4	147225281	147225282	L1	L1	925	553				L1
chr4	170834586	170834587	ALU	ALUYA5	2141	280	SINE	Alu	Ya5	ALU	AluYa5
chr4	172288840	172288841	ALU	ALUYC1	1281	282				ALU
chr4	174044214	174044215	ALU	ALUYI6	2176	276				ALU	AluY
chr4	174786693	174786694	ALU	ALUYA8	328	281	SINE	Alu	Ya8	ALU
chr4	179198310	179198311	ALU	ALUYA5	329	276	SINE	Alu	AluYa5	ALU
chr4	179444719	179444720	ALU	ALUYI6	328	269				ALU
chr4	186382145	186382146	ALU	ALUYB3A2	328	236				ALU
chr4	22043201	22043202	L1	L1	921	352				ALU	AluYb8
chr4	28320757	28320758	ALU	ALUYA5	344	281				ALU
chr4	40700738	40700739	ALU	ALUYA5	1905	280				ALU	AluYa5
chr4	53851834	53851835	ALU	ALUYA5	325	278				ALU
chr4	61055990	61055991	L1	L1	2141	467				ALU	AluYa5
chr4	65216736	65216737	ALU	ALUYE5	2155	273	SINE	Alu	AluY	ALU	AluYf4
chr4	67106597	67106598	ALU	ALUYA1	1190	278	SINE	Alu	Ya4b	ALU	AluYa5
chr4	72970710	72970711	ALU	ALUYA5	1235	280				ALU	AluYa5
chr4	76993808	76993809	ALU	ALUYB8	348	285				ALU
chr4	78873793	78873794	ALU	ALUYA5	328	282				ALU
chr4	83340675	83340676	ALU	ALUYA5	1588	282	SINE	Alu	Ya5	ALU
chr4	86099303	86099304	L1	L1PA16	924	401				ALU	AluY
chr4	86470368	86470369	L1	L1PA15	886	388				ALU	AluY
chr5	10201732	10201733	L1	L1HS	341	313				L1
chr5	110085917	110085918	ALU	ALUYB8	179	127				ALU
chr5	122582796	122582797	ALU	ALUYA5	1960	282				ALU	AluYa5
chr5	139595111	139595112	ALU	ALUYB8	364	289				ALU	AluYb8
chr5	155290612	155290613	ALU	ALUYA5	330	279	SINE	Alu	Ya5	ALU
chr5	156566726	156566727	ALU	ALUYB8	2791	284				ALU	AluYb8
chr5	158717156	158717157	ALU	ALUYA5	1951	278	SINE	Alu	AluYa5	ALU	AluYa5
chr5	16716607	16716608	ALU	ALUYG6	2131	270	SINE	Alu	Yg6	ALU	AluYg6
chr5	168911929	168911930	ALU	ALUYA5	319	274				ALU	AluYa5
chr5	1812639	1812640	ALU	ALUYA5	2686	264				ALU	AluYa5
chr5	18570154	18570155	ALU	ALUYB9	358	286	SINE	Alu	Yb10	ALU	AluYb9
chr5	25233916	25233917	ALU	ALUYA5	302	261				ALU
chr5	33633334	33633335	L1	L1HS	360	335				L1	?
chr5	36792597	36792598	ALU	ALUYB3A2	331	259				ALU
chr5	3995181	3995182	ALU	ALUYA5	1244	277	SINE	Alu	Ya5	ALU	AluYa5
chr5	4075832	4075833	ALU	ALUYA5	329	278				ALU	AluYa5
chr5	50785669	50785670	ALU	ALUYA5	330	278				ALU	AluYa5
chr5	54865783	54865784	ALU	ALUYB3A1	334	263				ALU	AluY
chr5	55927964	55927965	ALU	ALUYA5	934	278	SINE	Alu	Ya5	ALU	AluYa5
chr5	57716212	57716213	ALU	ALUYB8	342	280	SINE	Alu	AluYb8	ALU
chr5	61795399	61795400	ALU	ALUSZ	921	145				ALU
chr5	61857101	61857102	ALU	ALUYB8	336	289	SINE	Alu	Yb7	ALU	AluYb8
chr5	73145912	73145913	ALU	ALUYA5	329	278				ALU
chr5	78426548	78426549	SVA	SVA	347	293				SVA
chr5	84929774	84929775	ALU	ALUYA4	328	280				ALU	AluYa5
chr5	86372680	86372681	ALU	ALUYA5	314	259	SINE	Alu	Ya5a2	ALU	AluYa5
chr5	89450767	89450768	L1	L1HS	1272	333				L1
chr5	94994200	94994201	ALU	ALUYA4	2164	276	SINE	Alu	Ya5	ALU
chr5	99299904	99299905	ALU	ALUYA5	329	280				ALU	AluYa5
chr6	100328145	100328146	ALU	ALUYA5	329	280				ALU
chr6	110102975	110102976	ALU	ALUYB8	304	255				ALU	AluYb8
chr6	115788632	115788633	ALU	ALUYA5	328	280				ALU
chr6	116307079	116307080	ALU	ALUYA5	1224	245				ALU	AluYa5
chr6	116898670	116898671	ALU	ALUYB8	335	287				ALU	AluYb8
chr6	118626150	118626151	ALU	ALUYA1	307	251				ALU
chr6	120568245	120568246	ALU	ALUYB8	1224	275	SINE	Alu	Yb7	ALU
chr6	123853934	123853935	L1	L1HS	342	313				L1
chr6	125421401	125421402	ALU	ALUYA5	331	279				ALU	AluYa5
chr6	131273482	131273483	ALU	ALUYB8	1540	285				ALU	AluYb8
chr6	141770868	141770869	ALU	ALUYA5	1224	279				ALU	AluYa5
chr6	157397673	157397674	ALU	ALUYB8	337	287				ALU	AluYb9
chr6	159166284	159166285	ALU	ALUYA1	2810	237				ALU	AluYa5
chr6	159204418	159204419	ALU	ALUYB8	934	284	SINE	Alu	AluYb8	ALU	AluYb8
chr6	170500752	170500753	ALU	ALUYC1	2200	282	SINE	Alu	Yc1	ALU	AluY
chr6	18346384	18346385	ALU	ALUYA5	1183	278				ALU	AluYa5
chr6	18470146	18470147	ALU	ALUYA5	2185	276	SINE	Alu	AluYa5	ALU
chr6	19346442	19346443	ALU	ALUYC1	329	280				ALU	AluY
chr6	23978339	23978340	ALU	ALUYB8	337	284	SINE	Alu	Yb7	ALU	AluYb9
chr6	33030287	33030288	SVA	SVA	328	302				SVA
chr6	40731412	40731413	ALU	ALUYA5	330	279				ALU
chr6	43895475	43895476	ALU	ALUYA5	331	275	SINE	Alu	Ya5	ALU	AluYa5
chr6	55007917	55007918	ALU	ALUYA5	1236	276				ALU	AluYa5
chr6	57403533	57403534	ALU	ALUYE5	276	247				ALU	AluYf4
chr6	57444956	57444957	ALU	ALUYC1	352	282				ALU	AluY
chr6	66816114	66816115	ALU	ALUYB8	1207	273	SINE	Alu	AluYb8	ALU	AluYb8
chr6	68311294	68311295	ALU	ALUYB8	333	284	SINE	Alu	AluYb8	ALU	AluYb9
chr6	68314048	68314049	ALU	ALUYA5	1199	280	SINE	Alu	Ya5	ALU	AluYa5
chr6	69543454	69543455	ALU	ALUYB8	336	289				ALU	AluYb8
chr6	70327736	70327737	ALU	ALUY	350	280				ALU	AluY
chr6	72580479	72580480	ALU	ALUYC1	328	278	SINE	Alu	AluY	ALU	AluY
chr6	72753370	72753371	ALU	ALUYB8	302	251				ALU
chr6	77548606	77548607	ALU	ALUYB8	335	286				ALU	AluYb9
chr6	77980659	77980660	L1	L1HS	1275	349				L1
chr6	93576126	93576127	ALU	ALUYA5	1231	277				ALU	AluYa5
chr6	95368358	95368359	ALU	ALUYB9	336	279				ALU	AluYb9
chr6	96509162	96509163	ALU	ALUYG6	1243	280	SINE	Alu	AluYg6	ALU	AluYg6
chr6	98251320	98251321	ALU	ALUYA5	314	265	SINE	Alu	AluYa5	ALU	AluYa5
chr7	105564452	105564453	ALU	ALUYA5	328	276				ALU	AluYa5
chr7	107829247	107829248	L1	L1HS	345	316				L1
chr7	109077992	109077993	ALU	ALUYA5	200	153				ALU
chr7	138504445	138504446	ALU	ALUYA4	1211	280				ALU	AluYa5
chr7	138791596	138791597	ALU	ALUSZ	347	239				ALU
chr7	141013573	141013574	ALU	ALUYA5	329	280				ALU	AluYa5
chr7	147585773	147585774	ALU	ALUY	1209	276				ALU	AluY
chr7	153966034	153966035	ALU	ALUYC1	330	278				ALU	AluY
chr7	15666278	15666279	ALU	ALUYA5	329	282				ALU
chr7	157448772	157448773	ALU	ALUYA4	326	276	SINE	Alu	AluYa5	ALU	AluYa5
chr7	33195317	33195318	ALU	ALUYB8	339	286				ALU	AluYb8
chr7	38209202	38209203	ALU	ALUYA4	330	282				ALU	AluYa5
chr7	38478168	38478169	ALU	ALUYA5	1258	276				ALU
chr7	42647642	42647643	ALU	ALUYA5	328	282	SINE	Alu	Ya5	ALU	AluYa5
chr7	47551076	47551077	ALU	ALUYD8	303	267				ALU	AluYd8
chr7	56244897	56244898	ALU	ALUYB8	337	280	SINE	Alu	AluYb8	ALU	AluYb8
chr7	8019010	8019011	L1	L1HS	352	320				L1
chr7	82947142	82947143	ALU	ALUYB8	649	275	SINE	Alu	Yg6	ALU	AluYb8
chr7	84901723	84901724	L1	L1PA2	1158	229				L1
chr7	85044735	85044736	L1	L1HS	339	317				L1	?
chr7	95101182	95101183	ALU	ALUYB8	301	252				ALU
chr8	106664509	106664510	ALU	ALUYA5	2139	277	SINE	Alu	Ya5	ALU
chr8	110079083	110079084	L1	L1PA5	598	487	SINE	Alu	AluYa5/8	ALU	AluYa8
chr8	110101594	110101595	ALU	ALUYE5	328	277	SINE	Alu	AluY	ALU	AluYf4
chr8	114792907	114792908	L1	L1HS	782	651				ALU	AluYg6
chr8	122155278	122155279	L1	L1PA14	1262	631	SINE	Alu	AluYb8	ALU	AluYb8
chr8	125518122	125518123	ALU	ALUYB8	2529	246				ALU
chr8	125889958	125889959	ALU	ALUYA5	1283	247	SINE	Alu	Ya5a2	ALU	AluYa5
chr8	129244927	129244928	ALU	ALUYC1	348	280				ALU	AluY
chr8	132377878	132377879	ALU	ALUYA4	308	264				ALU	AluYa5
chr8	142940045	142940046	ALU	ALUYA5	305	253				ALU
chr8	15399335	15399336	ALU	ALUYE5	327	277	SINE	Alu	AluY	ALU	AluYf4
chr8	16102809	16102810	ALU	ALUYA5	2102	249	SINE	Alu	Ya5a2	ALU
chr8	19658921	19658922	ALU	ALUYB3A2	330	260				ALU
chr8	32359971	32359972	ALU	ALUY	1202	264				ALU
chr8	38864059	38864060	ALU	ALUY	344	278				ALU	AluY
chr8	41270456	41270457	ALU	ALUYB8	336	289				ALU	AluYb8
chr8	4452895	4452896	L1	L1PA2	1044	65				L1
chr8	59615976	59615977	ALU	ALUYB8	3336	280	SINE	Alu	AluYb8	ALU	AluYb8
chr8	61526779	61526780	ALU	ALUYA4	328	278	SINE	Alu	Ya4	ALU
chr8	9665653	9665654	ALU	ALUYB8	1246	287				ALU	AluYb8
chr8	9807887	9807888	ALU	ALUYB8	1231	283	SINE	Alu	AluYb8	ALU	AluYb8
chr9	103223394	103223395	ALU	ALUYD3	316	252				ALU
chr9	113571234	113571235	ALU	ALUYE5	328	275				ALU	AluYf4
chr9	117928261	117928262	ALU	ALUYC1	321	256				ALU	AluY
chr9	118509738	118509739	ALU	ALUY	329	266	SINE	Alu	AluY	ALU
chr9	128980159	128980160	ALU	ALUYD3A1	187	127	SINE	Alu	AluY	ALU
chr9	16682299	16682300	ALU	ALUYI6	398	270				ALU	AluY
chr9	21261942	21261943	ALU	ALUYE5	328	275	SINE	Alu	AluY	ALU	AluYf4
chr9	22288706	22288707	ALU	ALUYA4	1232	280				ALU	AluYa5
chr9	32463886	32463887	ALU	ALUYD2	1080	250				L1
chr9	37594233	37594234	ALU	ALUYC1	1676	275				ALU	AluY
chr9	93194533	93194534	ALU	ALUYA5	2113	262				ALU	AluYa5
chr9	94416756	94416757	L1	L1HS	307	275				L1
chr9	97314239	97314240	ALU	ALUYA5	329	282	SINE	Alu	Ya5	ALU	AluYa5
chrX	111557746	111557747	L1	L1HS	325	299				L1
chrX	136957286	136957287	ALU	ALUY	314	246				ALU	AluY
chrX	149451312	149451313	ALU	ALUYA5	328	280	SINE	Alu	AluYa5	ALU	AluYa5
chrX	28446496	28446497	ALU	ALUYB8	338	284				ALU
chrX	32001070	32001071	ALU	ALUY	1213	246				ALU
chrX	87976537	87976538	ALU	ALUYB8	338	284				ALU
chrX	88995940	88995941	ALU	ALUYC1	205	115				ALU
